# Supplementary material for: Quantitative prediction of variant effects on alternative splicing in MAPT using endogenous pre-messenger RNA structure probing
Source: eLife journal article supplement (doi:10.7554/elife.73888), 2022-06-13
Supplement: data1 [file elife-73888-data1-v2.pdf]

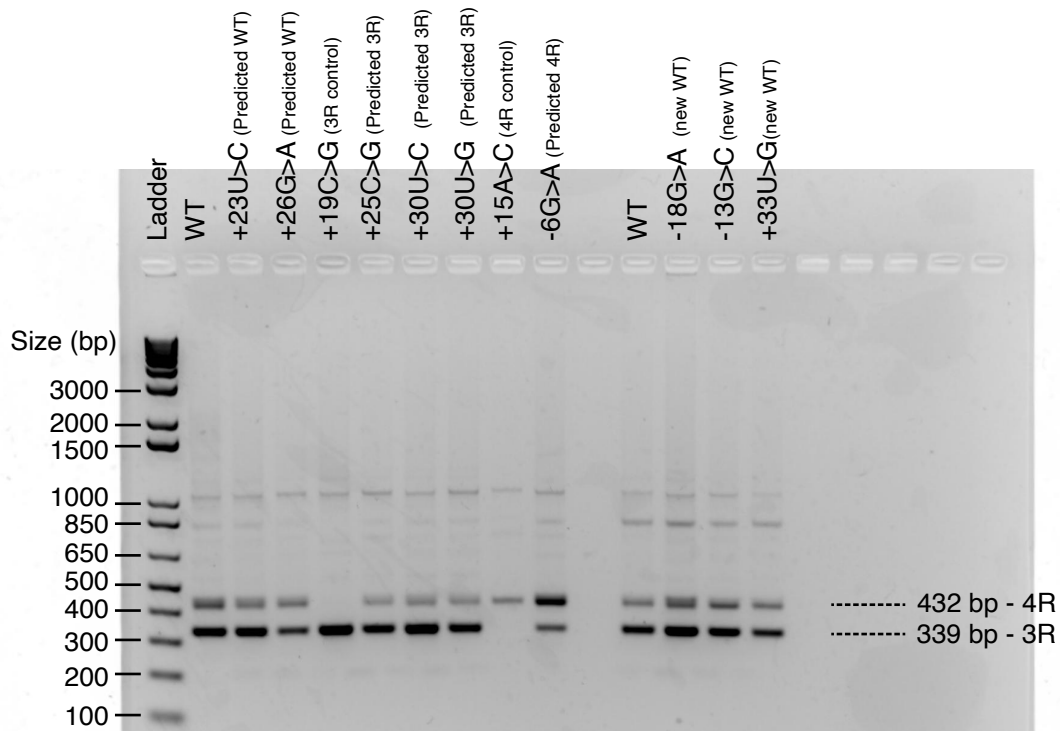

Rep1 - MAPT Splicing Assay  
2% agarose gel in 1X tris-acetate EDTA (TAE) buffer

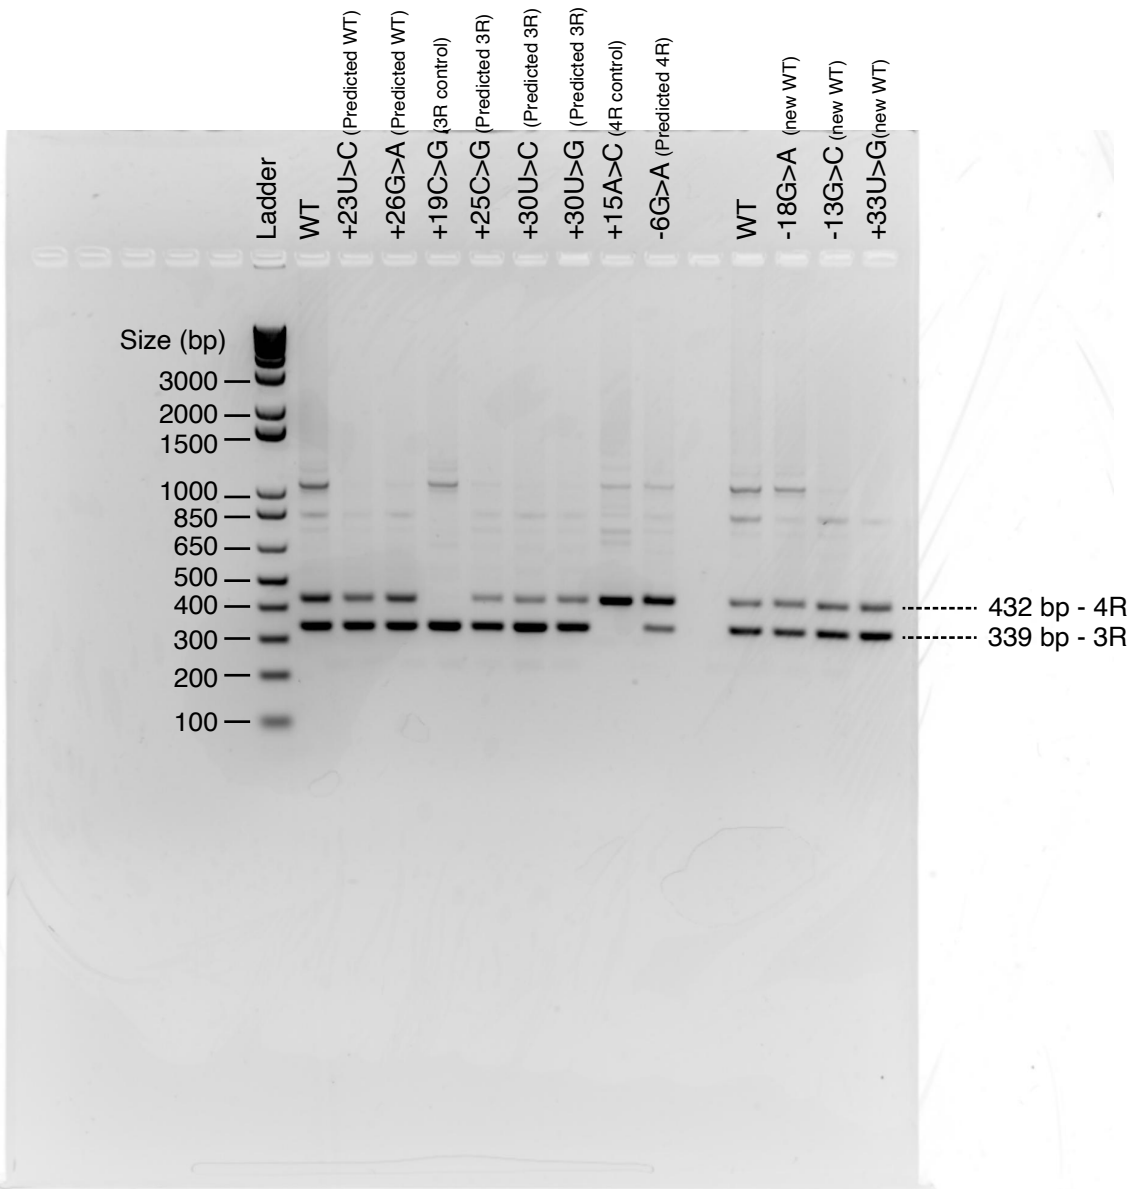

Rep 2 - MAPT Splicing Assay  
2% agarose gel in 1X tris-acetate EDTA (TAE) buffer

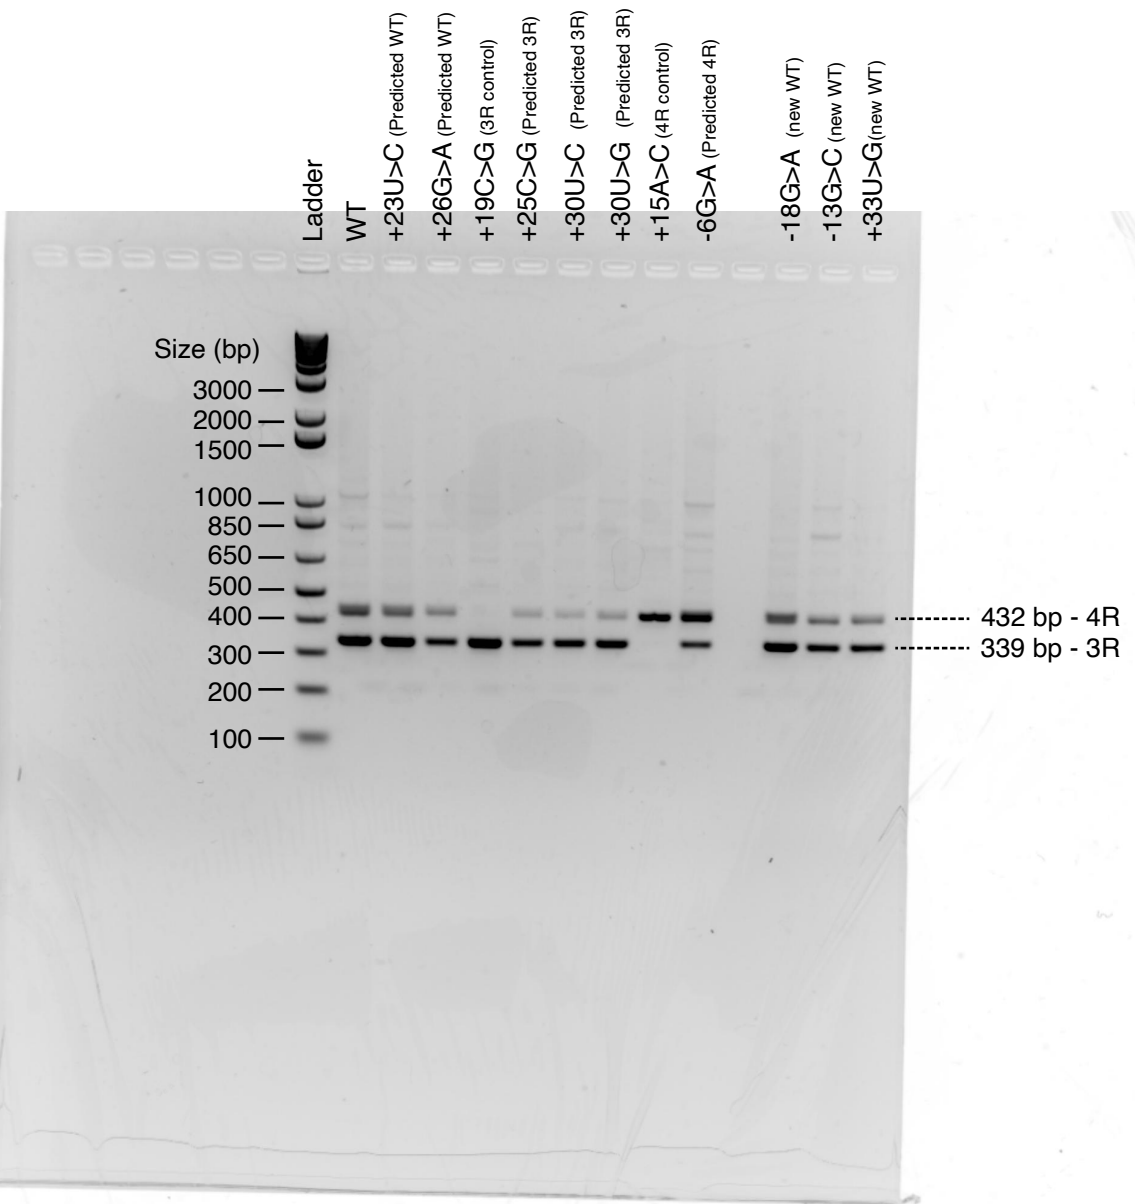

Rep 3 - MAPT Splicing Assay  
2% agarose gel in 1X tris-acetate EDTA (TAE) buffer
