# Supplementary material for: Quantitative prediction of variant effects on alternative splicing in MAPT using endogenous pre-messenger RNA structure probing
Source: eLife journal article supplement (doi:10.7554/elife.73888), 2022-06-13
Supplement: supp [file elife_poa_e73888_Related_Manuscript_File.docx]

| **Key Resources Table** | | | | |
| --- | --- | --- | --- | --- |
| **Reagent type (species) or resource** | **Designation** | **Source or reference** | **Identifiers** | **Additional information** |
| cell line (*Homo-sapiens*) | T-47D | ATCC | HTB-133 | epithelial cells from ductal carcinoma of breast |
| cell line (*Homo-sapiens*) | SH-SY5Y | ATCC | CRL-2266 | neuroblastoma cells from bone marrow |
| recombinant DNA reagent | Wild-type splicing reporter plasmid for MAPT exon 10 – intron 10 junction | Tan et al., 2019 |  |  |
| sequence-based reagent | Exon10Intron10-Fwd | This paper | PCR primers | AACGTCCAGTCCAAGTGTGG |
| sequenced-based reagent | Exon10Intron10-Rev | This paper | PCR primers | CATTCACCCAGAGGTCGCAG |
| sequenced-based reagent | 3R/4R-Fwd | This paper | PCR primers | GCAGTGGTCCGTACTCCAC |
| sequenced-based reagent | 3R/4R-Rev | This paper | PCR primers | TGATGGATGTTGCCTAATGAGC |
