# Supplementary material for: Quantitative prediction of variant effects on alternative splicing in MAPT using endogenous pre-messenger RNA structure probing
Source: eLife. 2022 Jun 13;11:e73888. doi: 10.7554/eLife.73888 (PMC9236610; doi:10.7554/eLife.73888)
Supplement: Supplementary file 2. [file elife-73888-supp2.xlsx]

## Sheet: Single Mutations Training Set
Supplementary file 2
MutID	Label	Type of mutation	Amino Acid change	HGMD ID	Disease	Position	WT	MUT	PSI	Disease Pubmed ID	Splicing Assay Pubmed ID	Notes
Mut1	4R	Exonic Non-synonymous	N279K	CM981234	Frontotemporal_dementia_with_parkinsonism	-79	T	G	0.8	9789048	10318930
Mut2	4R	Exonic Non-synonymous	N279K			-79	T	A	0.6		10748133
Mut3	4R	Exonic Non-synonymous	L284P			-65	T	C	0.85		10748133
Mut4	4R	Exonic Synonymous	L284L	CS994525	Frontotemporal_dementia_with_parkinsonism	-64	T	C	0.89	10318930	10318930
Mut5	4R	Exonic Non-synonymous	S285R	CS126516	Supranuclear_palsy_progressive	-63	A	C	1	22818528	22818528
Mut6	4R	Exonic Non-synonymous	S285G			-63	A	G	0.7		10748133
Mut7	4R	Exonic Synonymous	G292G			-40	C	A	0.93		30793898
Mut8	4R	Exonic Non-synonymous	N296H	CM014584	Frontotemporal_dementia_with_parkinsonism	-30	A	C	0.88	11585254	11911984/11906000
Mut9	4R	Exonic Synonymous	N296N	CS003183	Frontotemporal_dementia/corticobasal_degeneration	-28	T	C	0.94	11117553	11911984/11906000/11117553
Mut10	4R	Exonic Non-synonymous	K298E	CS140469	Frontotemporal_lobar_degeneration	-24	A	G	0.85	24292008	24292008
Mut11	WT	Exonic Non-synonymous	V300I			-18	G	A	0.5			Supplementary file 7
Mut12	WT	Exonic Non-synonymous	P301L	CM981235	Frontotemporal_dementia_with_parkinsonism	-14	C	T	0.42	9641683	10318930
Mut13	WT	Exonic Synonymous	P301P			-13	G	C	0.5			Supplementary file 7
Mut14	WT	Exonic Synonymous	P301P			-13	G	A	0.46		11456301
Mut15	3R	Exonic Synonymous	G304G			-4	C	G	0		30793898
Mut16	4R	Exonic Non-synonymous	S305N	CM992927	Frontotemporal_dementia	-2	G	A	1	10208578	30793898
Mut17	4R	Exonic Non-synonymous	S305I	CS084750	Argyrophilic_grain_disease	-2	G	T	0.73	18066559	18066559
Mut18	4R	Exonic Synonymous	S305S	CS004157	Supranuclear_palsy_progressive	-1	T	C	0.99	10775534	26297556/10775534
Mut19	4R	Intronic	NA	CS982264	Multiple_system_tauopathy_with_presenile_dementia	3	G	A	1	9636220	30793898
Mut20	3R	Intronic	NA	CS112532	Frontotemporal_dementia	4	A	C	0.42	21295377	21295377
Mut21	WT	Intronic	NA			8	C	T	0.5		10329720
Mut22	WT	Intronic	NA			9	C	T	0.47		10329720
Mut23	4R	Intronic	NA	CS012211	Frontotemporal_dementia_with_parkinsonism	11	T	C	0.96	11456301	30793898/11456301
Mut24	4R	Intronic	NA	CS000864	Frontotemporal_dementia	12	C	T	0.99	10762152	30793898/10762152
Mut25	4R	Intronic	NA	CS982261	Frontotemporal_dementia_with_parkinsonism	13	A	G	0.98	9641683	30793898/9641683
Mut26	4R	Intronic	NA	CS982262	Frontotemporal_dementia_with_parkinsonism	14	C	T	0.99	9641683	30793898/9641683
Mut27	4R	Intronic	NA	CS1510112	Frontotemporal_lobar_degeneration	15	A	C	1	26297556	30793898/26297556
Mut28	4R	Intronic	NA	CS982263	Frontotemporal_dementia_with_parkinsonism	16	C	T	1	9641683	30793898/9641683
Mut29	3R	Intronic	NA			17	NA	T	0.08		30793898
Mut30	3R	Intronic	NA			18	T	C	0.02		30793898
Mut31	3R	Intronic	NA	CS033125	Frontotemporal_dementia	19	C	G	0.01	12615641	30793898/12615641
Mut32	3R	Intronic	NA	CS033126	Frontotemporal_dementia	29	G	A	0.1	12615641	12615641
Mut33	WT	Intronic	NA			33	T	G	0.5			Supplementary file 7

## Sheet: Double Mutations Training Set
MutID	Label	Type of mutation	Splicing Assay Pubmed ID	Position 1	WT 1	MUT1	Position 2	WT2	MUT2	PSI
Mut34	3R	Compensatory	30793898	-40	C	A	19	C	G	0.01
Mut35	3R	Compensatory	30793898	-4	C	G	17	G	A	0
Mut36	4R	Compensatory	﻿10318930/10329720	-2	G	A	16	C	T	0.95
Mut37	4R	Compensatory	30793898	-2	G	A	19	C	G	1
Mut38	4R	Compensatory	10329720	3	G	A	12	C	T	0.95
Mut39	4R	Compensatory	30793898	3	G	A	19	C	G	1
Mut40	4R	Compensatory	30793898	12	C	T	19	C	G	0.98
Mut41	4R	Compensatory	30793898	13	A	G	19	C	G	0.99
Mut42	4R	Compensatory	30793898	14	C	T	19	C	G	0.88
Mut43	4R	Compensatory	30793898	15	A	C	19	C	G	0.98
Mut44	3R	Compensatory	30793898	17	NA	T	18	T	C	0.03
Mut45	3R	Compensatory	30793898	17	NA	T	18	NA	A	0.08
Mut46	3R	Compensatory	30793898	17	G	NA	19	C	G	0.01
Mut47	3R	Compensatory	30793898	17	G	A	19	C	G	0
