# Supplementary material for: Quantitative prediction of variant effects on alternative splicing in MAPT using endogenous pre-messenger RNA structure probing
Source: eLife. 2022 Jun 13;11:e73888. doi: 10.7554/eLife.73888 (PMC9236610; doi:10.7554/eLife.73888)
Supplement: Supplementary file 3. [file elife-73888-supp3.xlsx]

## Sheet: Sheet1
Supplementary file 3
SNP_ID	Pos wrt E10I10 boundary	WT Base	MUT Base	rsID	Type of Mutation
SNP1	-93	G	U	rs1064797225	NonSynonymous
SNP2	-91	G	A	rs754030956	Synonymous
SNP3	-90	C	A	rs865984780	NonSynonymous
SNP4	-88	G	A	rs1411362620	Synonymous
SNP5	-83	U	C	rs890270735	NonSynonymous
SNP6	-78	A	G	rs1369606320	NonSynonymous
SNP7	-77	A	G	rs755156853	NonSynonymous
SNP8	-76	G	A	rs182024939	Synonymous
SNP9	-76	G	U	rs182024939	NonSynonymous
SNP10	-72	C	U	rs1340490783	Synonymous
SNP11	-70	G	A	rs1449406929	Synonymous
SNP12	-69	G	A	rs1284201310	NonSynonymous
SNP13	-58	C	G	rs779043983	NonSynonymous
SNP14	-58	C	U	rs779043983	Synonymous
SNP15	-57	G	A	rs149280278	NonSynonymous
SNP16	-57	G	C	rs149280278	NonSynonymous
SNP17	-55	C	A	rs1275756209	Synonymous
SNP18	-54	C	U	rs758312016	NonSynonymous
SNP19	-49	C	U	rs1341757576	Synonymous
SNP20	-44	G	U	rs1203223798	NonSynonymous
SNP21	-42	G	C	rs865832527	NonSynonymous
SNP22	-42	G	U	rs865832527	NonSynonymous
SNP23	-19	C	U	rs147401702	Synonymous
SNP24	-15	C	U	rs63751438	NonSynonymous
SNP25	-8	G	U	rs63751391	NonSynonymous
SNP26	-7	C	U	rs759206337	Synonymous
SNP27	-6	G	A	rs780862453	NonSynonymous
SNP28	-4	C	U	rs376554760	Synonymous
SNP29	3	G	C	rs63750013	Intronic
SNP30	8	C	A	rs775115195	Intronic
SNP31	17	G	U	rs762590440	Intronic
SNP32	23	U	C	rs773806680	Intronic
SNP33	25	C	G	rs63750117	Intronic
SNP34	25	C	U	rs63750117	Intronic
SNP35	26	G	A	rs1298826137	Intronic
SNP36	28	C	A	rs1364845993	Intronic
SNP37	30	U	C	rs754219686	Intronic
SNP38	30	U	G	rs754219686	Intronic
SNP39	50	G	C	rs11652912	Intronic
SNP40	65	G	A	rs1033118073	Intronic
SNP41	66	C	U	rs190460717	Intronic
SNP42	67	G	A	rs567911073	Intronic
SNP43	75	G	C	rs1314208933	Intronic
SNP44	76	C	U	rs536874815	Intronic
SNP45	77	G	A	rs140777094	Intronic
SNP46	99	C	A	rs955370312	Intronic
SNP47	107	G	A	rs752490710	Intronic
SNP48	114	G	U	rs1429550170	Intronic
SNP49	117	U	A	rs1342991479	Intronic
SNP50	125	C	U	rs1304446997	Intronic
SNP51	128	C	A	rs576695559	Intronic
SNP52	131	C	A	rs957743663	Intronic
SNP53	135	G	A	rs1386214588	Intronic
SNP54	137	G	A	rs1424672414	Intronic
SNP55	138	A	G	rs989124384	Intronic
