# Supplementary material for: Quantitative prediction of variant effects on alternative splicing in MAPT using endogenous pre-messenger RNA structure probing
Source: eLife. 2022 Jun 13;11:e73888. doi: 10.7554/eLife.73888 (PMC9236610; doi:10.7554/eLife.73888)
Supplement: Supplementary file 4. [file elife-73888-supp4.xlsx]

## Sheet: Sheet1
Supplementary file 4
Primer	Sequence
Exon10Intron10-Fwd	AACGTCCAGTCCAAGTGTGG
Exon10Intron10-Rev	CATTCACCCAGAGGTCGCAG
3R/4R-Fwd	GCAGTGGTCCGTACTCCAC
3R/4R-Rev	TGATGGATGTTGCCTAATGAGC
