# Supplementary material for: Quantitative prediction of variant effects on alternative splicing in MAPT using endogenous pre-messenger RNA structure probing
Source: eLife. 2022 Jun 13;11:e73888. doi: 10.7554/eLife.73888 (PMC9236610; doi:10.7554/eLife.73888)
Supplement: Supplementary file 5. [file elife-73888-supp5.xlsx]

## Sheet: Exonic Enhancers
Supplementary file 5
Exonic Enhancers (ESEs)
Cluster 1
A	C	G	T
0.69	-0.029	-0.212	-0.88
-3.585	-3.585	1.907	-3.585
1.624	-3.585	-3.585	-0.415
-1.263	1.059	-0.415	-0.415
-3.585	-3.585	1.907	-3.585
1.773	-1.263	-3.585	-3.585
0.746	0.569	-1.346	-1.163
Cluster 2
A	C	G	T
0.881	0.174	-1.424	-0.606
0.763	-0.815	0.492	-1.606
0.144	-4.248	1.367	-1.926
1.861	-1.926	-4.248	-4.248
-4.248	-1.926	-1.078	1.683
0.144	-1.078	1.11	-1.926
0.628	-0.164	-2.644	0.488
0.557	-0.668	0.356	-0.692
Cluster 3
A	C	G	T
0.994	0.091	-1.306	-0.891
1.014	-0.156	-0.795	-0.981
0.819	-0.349	0.412	-3.059
1.845	-4.755	-4.755	-1.585
1.959	-4.755	-4.755	-4.755
-4.755	0.86	0.603	-0.667
-3.095	0.888	-0.624	0.469
0.873	-0.538	-1.492	0.169
0.902	0.011	-0.674	-1.006
Cluster 4
A	C	G	T
0.981	0.002	-0.832	-1.11
1.088	-0.521	-0.528	-1.047
0.507	-1.468	0.668	-0.669
1.07	0.465	-1	-5.644
1.978	-5.644	-5.644	-5.644
1.978	-5.644	-5.644	-5.644
-0.143	0.537	0.429	-1.752
0.922	-0.065	-0.735	-0.868
0.838	-0.047	-0.518	-0.874
Cluster 5
A	C	G	T
0.961	0.155	-1.057	-1.123
0.824	-0.1	-0.252	-1.128
1.167	-1.102	-1.3	-0.181
1.2	-2	0.527	-6.392
-0.664	-2	1.636	-6.392
1.97	-6.392	-6.392	-4.07
0.985	-0.791	-0.052	-1.063
0.779	-0.366	-0.188	-0.667
0.868	-0.01	-0.839	-0.683
Cluster 6
A	C	G	T
1.07	0.031	-1.28	-1.1
0.763	-0.504	-1.069	0.166
0.624	-0.497	-0.885	0.273
-4.585	-4.585	-1.415	1.824
-4.585	-1.415	1.824	-4.585
0.773	-4.585	1.143	-4.585
1.754	-1.094	-3.421	-3.943
1.114	-0.481	-1.549	-0.365
Cluster 7
A	C	G	T
1.144	-0.396	-0.93	-0.986
0.7	-3	-3	1.087
-3	1.858	-3	-3
-0.678	-3	-0.678	1.392
-0.678	-3	-3	1.644
-3	1.858	-3	-3
1.251	-1.862	0.22	-2.474
Cluster 8
A	C	G	T
1.188	0.283	-2.191	-1.804
0.873	-1.634	-3.57	0.817
-1.078	-0.547	0.144	0.796
-4.248	1.774	-1.078	-4.248
1.942	-4.248	-4.248	-4.248
-0.547	-4.248	1.48	-1.078
1.312	-0.597	-0.864	-1.702
0.997	-0.046	-0.886	-1.015

## Sheet: Exonic Silencers
Exonic Silencers (ESSs)
Cluster 1
A	C	G	T
0.762	-0.109	-0.258	-0.887
0.557	-0.754	-0.3	0.168
-0.85	-2.919	1.612	-1.968
-4.524	-4.524	1.952	-4.524
-4.524	-4.524	1.952	-4.524
-0.823	-4.524	1.666	-2.202
0.143	-1.56	-0.568	0.912
-0.013	-1.118	0.695	-0.107
0.904	-0.134	-0.36	-1.19
Cluster 2
A	C	G	T
0.057	-0.678	-0.112	0.496
-3	0.17	0.17	0.7
-0.678	0.17	-0.678	0.7
-3	-3	-3	1.858
-3	-3	1.858	-3
-3	-3	1.858	-3
-0.26	-1.105	1.23	-1.494
Cluster 3
A	C	G	T
0.569	-0.336	0.134	-0.674
-0.288	-1.21	-0.12	0.871
-1.222	-0.692	1.1	-0.305
-4.392	-4.392	-4.392	1.948
1.63	-4.392	-4.392	-0.305
0.466	-4.392	1.336	-4.392
-1.407	-1.788	1.495	-0.959
0.661	-0.403	-0.295	-0.239
Cluster 4
A	C	G	T
0.319	-0.004	-0.105	-0.278
-4	-4	-4	1.931
1.833	-4	-1.678	-4
-1.678	-4	1.833	-4
-4	-4	1.358	0.392
-4	-4	1.044	0.858
0.176	-1.243	0.296	0.287
Cluster 5
A	C	G	T
1.055	-0.04	-1.034	-1.117
1.011	-1.124	0.382	-2.164
-0.547	-4.248	1.683	-4.248
-4.248	-4.248	1.861	-1.926
-4.248	-4.248	-4.248	1.942
0.796	-4.248	-1.078	0.796
0.003	-3.277	-0.47	1.119
1.018	-0.673	-0.722	-0.432
Cluster 6
A	C	G	T
-1.624	-2.141	0.579	0.968
-3.17	-3.17	-3.17	1.874
0.531	0	-3.17	0.531
-3.17	-3.17	1.874	-3.17
-3.17	-3.17	-3.17	1.874
-3.17	-3.17	-0.848	1.688
0.826	0.429	-1.1	-1.275
Cluster 7
A	C	G	T
0.748	-0.055	-0.992	-0.227
0.932	0.189	-1.52	-0.73
-0.364	-2.779	1.574	-3.322
-3.807	-3.807	-0.637	1.684
-3.807	-3.807	-3.807	1.921
-3.807	1.55	-3.807	-0.107
-2.166	0.375	0.853	-0.569
-0.102	-0.897	-0.943	1.008
0.801	-0.232	-0.189	-0.92

## Sheet: Intronic Enhancers
Intronic Enhancers (ISEs)
Cluster 1
A	C	G	T
-0.206	-1	1.189	-1.501
-2.585	-2.585	-2.585	1.807
1.115	-2.585	-2.585	0.585
1.807	-2.585	-2.585	-2.585
-2.585	1.115	0.585	-2.585
-2.585	-2.585	1.807	-2.585
-0.019	-0.371	0.88	-1.322
Cluster 2
A	C	G	T
0.575	-0.589	0.501	-1.218
0.17	-3	1.392	-3
-3	-3	1.858	-3
0.17	-3	-3	1.392
-0.678	-3	1.644	-3
-3	-3	1.644	-0.678
-0.725	-1.494	0.328	0.836
Cluster 3
A	C	G	T
0.745	-0.64	-0.07	-0.455
0.889	-1.459	-0.779	0.265
-0.943	-3.281	1.726	-3.866
-2.07	-4.392	1.874	-4.392
-4.392	-4.392	1.948	-4.392
-0.305	-4.392	1.63	-4.392
-0.67	-1.505	0.401	0.765
0.699	-0.513	0.219	-0.965
1.001	-0.371	-0.679	-0.737
Cluster 4
A	C	G	T
-0.531	-3.7	0.943	0.387
-1.379	-3.7	0.943	0.692
-1.379	-3.7	0	1.344
-1.379	-1.379	-3.7	1.657
-3.7	-3.7	1.914	-3.7
-3.7	-3.7	1.914	-3.7
Cluster 5
A	C	G	T
0.57	-0.252	-0.983	0.226
0.441	-3.059	0.579	0.04
0	-1.766	-0.918	1.122
-0.918	-1.766	0.305	0.957
-4.087	-4.087	1.935	-4.087
-1.766	-4.087	1.843	-4.087
-1.297	-1.837	1.31	-0.264
0.857	-0.098	-0.423	-0.976
Cluster 6
A	C	G	T
-2.807	-2.807	1.837	-2.807
-2.807	-2.807	-2.807	1.837
1.28	-2.807	-0.485	-0.485
-2.807	-2.807	0.363	1.28
-2.807	-2.807	-2.807	1.837
-2.807	-0.485	0.363	0.893
Cluster 7
A	C	G	T
0.868	0.088	-0.528	-1.255
1.386	-1.788	-0.414	-1.528
-4.392	-4.392	1.948	-4.392
-2.07	-4.392	1.441	0
-2.07	-4.392	-1.222	1.716
0.965	-4.392	-4.392	0.965
0.363	-3.451	0.68	0.03
0.532	-0.097	-0.329	-0.281

## Sheet: Intronic Silencers
Intronic Silencers (ISSs)
Cluster 1
A	C	G	T
0.952	0.124	-1.097	-0.979
1.22	-0.164	-1.243	-1.494
0.685	-1.678	0.483	-0.551
-2.304	1.388	0.111	-3.322
-4	-4	-4	1.931
-0.83	-4	-4	1.728
-4	1.931	-4	-4
1.836	-2.599	-2.862	-2.971
0.211	-0.786	0.738	-0.749
0.755	0.053	-0.439	-0.896
Cluster 2
A	C	G	T
0.746	-0.068	-0.21	-0.987
0.67	-0.361	-0.045	-0.596
-0.284	1.427	-2.041	-2.022
-1.205	-2.278	-2.759	1.684
-3.7	1.914	-3.7	-3.7
-3.7	1.657	-3.7	-0.531
-3.7	-3.7	-3.7	1.914
-1.289	1.71	-2.616	-2.672
0.203	1.138	-1.563	-1.686
1.283	-0.511	-1.449	-1.004
0.85	0	-0.596	-0.901
Cluster 3
A	C	G	T
0.893	0.131	-1.118	-0.767
1.065	-0.252	-1.08	-0.75
-0.507	-2.216	1.392	-1.131
-4.858	-4.858	1.962	-4.858
1.962	-4.858	-4.858	-4.858
1.962	-4.858	-4.858	-4.858
-3.254	1.87	-4.216	-2.436
0.16	0.523	-3.273	0.424
0.91	-1.189	-0.921	0.207
1.074	-0.101	-0.844	-1.302
Cluster 4
A	C	G	T
0.667	-0.041	-0.127	-0.932
0.703	-0.498	-1.351	0.347
0.596	-1.238	-1.989	0.858
-1.718	-2.506	1.754	-2.756
-3.322	1.888	-3.322	-3.322
1.888	-3.322	-3.322	-3.322
1.888	-3.322	-3.322	-3.322
1.789	-2.293	-2.474	-2.644
0.111	-0.662	0.944	-1.458
Cluster 5
A	C	G	T
0.669	-0.12	0.091	-1.234
1.506	-0.916	-1.761	-1.578
1.541	-2.059	-2.556	-0.556
-3	-3	-3	1.858
-0.678	-3	-3	1.644
-3	-3	-3	1.858
1.858	-3	-3	-3
-0.349	-0.889	1.239	-1.667
Cluster 6
A	C	G	T
0.544	0.089	-0.097	-0.881
0.537	-0.822	-1.133	0.611
0.704	-1.042	-1.042	0.485
-0.485	-0.085	-5.129	1.211
1.969	-5.129	-5.129	-5.129
-5.129	-2.807	1.882	-2.807
-3.433	-4.188	1.931	-4.644
0.907	-0.155	-0.492	-0.956
1.041	-0.149	-0.95	-0.934
Cluster 7
A	C	G	T
0.384	-0.485	0.739	-1.679
1.087	-1.042	-2.014	0.193
1.799	-2.846	-1.817	-3.364
-4.392	1.948	-4.392	-4.392
1.948	-4.392	-4.392	-4.392
-2.788	-1.846	1.726	-1.897
-0.255	1.277	-2.322	-0.892
0.582	-0.56	-1.618	0.584
0.734	-0.367	-1.117	0.139
Cluster 8
A	C	G	T
1.004	0.074	-1.298	-0.901
0.778	-0.439	0.321	-1.744
1.483	-2.03	-0.291	-2.821
-0.136	1.087	-0.273	-2.852
1.654	-1.657	-0.965	-5.358
-5.358	-2.188	-5.358	1.9
0.531	-4.358	1.305	-4.792
0.814	-0.78	0.226	-1.03
0.737	-0.415	-0.785	0.004
0.783	-0.071	-1.007	-0.27
