# Supplementary material for: Quantitative prediction of variant effects on alternative splicing in MAPT using endogenous pre-messenger RNA structure probing
Source: eLife. 2022 Jun 13;11:e73888. doi: 10.7554/eLife.73888 (PMC9236610; doi:10.7554/eLife.73888)
Supplement: Supplementary file 6. [file elife-73888-supp6.xlsx]

## Sheet: model_results
Supplementary file 6
Model Results
Predictor(s)	Mutation Set	Spliceosome complex	Pearson's R2	Pseudo_r2	Intercept_pval	Pred1_pval	Pred2_pval	Pred3_pval	Pred4_pval	Pred5_pval	Pred6_pval	Pred7_pval	Pred8_pval	Pred9_pval	Pred10_pval	Pred11_pval	Pred12_pval	Pred13_pval	Pred14_pval	Pred15_pval	Pred16_pval	Pred17_pval	Pred18_pval	Pred19_pval	Pred20_pval	Pred21_pval
strucMean+strucSD+strucSkew+strucKurtosis	Synonymous, Intronic	Pre-B	0.77	0.5675	0.1208	0.0614	0.2427	0.4398	0.4422
strucMean+strucSD+strucSkew+strucKurtosis	Synonymous, Intronic	B	0.81	0.6927	0.35943	5.91e-05	0.01814	0.00423	0.01047
strucMean+strucSD+strucSkew+strucKurtosis	Synonymous, Intronic	Pre-Bact	0.83	0.6456	0.170778	0.000137	0.005898	0.007699	0.040906
strucMean+strucSD+strucSkew+strucKurtosis	Synonymous, Intronic	Bact	0.89	0.7429	0.019382	2.77e-09	0.000979	0.000333	0.014782
strucMean+strucSD+strucSkew+strucKurtosis	All	Bact	0.74	0.5626	0.00114	1.03e-08	0.00144	0.01544	0.29413
SS	All		0.29	0.08639	0.0505	0.063
SS + Enhancer + Silencer	All		0.5	0.2518	0.03129	0.0108	0.68599	0.00364
InclusionRBPs + ExclusionRBPs	All		0.08	0.006699	0.0578	0.6426	0.9275
strucMean+strucSD+strucSkew+strucKurtosis+SS + Enhancer + Silencer	All	Bact	0.8	0.6815	0.001498	5.9e-10	2.01e-05	0.014637	0.29932	0.805589	0.370472	0.000423
(Enhancer + Silencer+SS)*isNonSynonymous)+((strucMean+strucSD+strucSkew+strucKurt)*(isIntronic+isSynonymous)	All	Bact	0.89	0.7729	0.7386	0.0684	0.0393	0.4353	0.0964	0.5902	0.6485	0.5743	0.5913	0.1267	0.2239	0.2834	0.4198	0.2474	0.28	0.0859	0.0337	0.6059	0.0477	0.6144	0.6999	0.1942

## Sheet: training_set_features
Training Set features
MutID	SS	Enhancer	Silencer	strucMean	strucSD	strucSkew	strucKurt	ExperimentalPSI	Label	isSynonymous	isNonSynonymous	isIntronic	ESE	ESS	ISE	ISS
WT	0	0	0	0	0	0	0	0.56	WT	0	0	0	0	0	0	0
Mut1	0	5.54067	-1.562	1.2143	0.0962366	-0.360204	-0.0326188	0.8	NonSynonymous	0	1	0	5.54067	-1.562	0	0
Mut2	0	7.91767	-1.642	0.0289	0.0131296	0.0210139	-0.219092	0.6	NonSynonymous	0	1	0	7.91767	-1.642	0	0
Mut3	0	-0.34925	-1.696	-0.5719	-0.215437	0.278824	0.164841	0.85	NonSynonymous	0	1	0	-0.34925	-1.696	0	0
Mut4	0	0.953	-3.139	-1.5456	-0.106771	1.40177	5.10168	0.89	Synonymous	1	0	0	0.953	-3.139	0	0
Mut5	0	0.18075	-1.5635	-0.4201	0.173148	0.605448	0.886107	1	NonSynonymous	0	1	0	0.18075	-1.5635	0	0
Mut6	0	-0.4118	2.41633	3.3426	2.64639	0.178353	-0.776448	0.7	NonSynonymous	0	1	0	-0.4118	2.41633	0	0
Mut7	0	3.7335	0.8705	-1.365	-0.411359	0.89904	1.58261	0.93	Synonymous	1	0	0	3.7335	0.8705	0	0
Mut8	0	-1.50283	-3.23133	0.9782	0.498056	0.125273	1.03051	0.88	NonSynonymous	0	1	0	-1.50283	-3.23133	0	0
Mut9	0	0.461625	-0.535	-0.2356	0.183861	0.342261	0.377313	0.94	Synonymous	1	0	0	0.461625	-0.535	0	0
Mut10	0	-1.54875	0	1.1812	0.630909	0.114981	1.05114	0.85	NonSynonymous	0	1	0	-1.54875	0	0	0
Mut11	0	1.24325	-1.181	-0.0155	1.55252	0.727702	0.454282	0.55	NonSynonymous	0	1	0	1.24325	-1.181	0	0
Mut12	0	-0.129	2.55867	1.1118	1.25992	-0.599175	-0.334871	0.42	NonSynonymous	0	1	0	-0.129	2.55867	0	0
Mut13	0	0.336333	-2.94167	0.661	1.86328	0.0828832	-1.27283	0.55	Synonymous	1	0	0	0.336333	-2.94167	0	0
Mut14	0	2.01575	-1.81933	-0.2652	-0.244369	0.295763	1.34637	0.46	Synonymous	1	0	0	2.01575	-1.81933	0	0
Mut15	0	0	2.638	3.4	0.604221	0.801564	0.415788	0	Synonymous	1	0	0	0	2.638	0	0
Mut16	0.84	0	0	-5.322	0.776307	1.06329	2.85917	1	NonSynonymous	0	1	0	0	0	0	0
Mut17	0.39	0	0	-0.3241	-0.605235	-0.899679	1.21173	0.73	NonSynonymous	0	1	0	0	0	0	0
Mut18	1.24	0	0	-3.804	-1.71917	-0.418254	4.95849	0.99	Synonymous	1	0	0	0	0	0	0
Mut19	1.5	0	0	-4.6806	0.520666	0.513566	1.99205	1	Intronic	0	0	1	0	0	0	0
Mut20	-3.82	0	0	14.8654	3.55335	-1.53402	0.954027	0.42	Intronic	0	0	1	0	0	0	0
Mut21	0	2.6955	1.1905	-0.1122	0.268482	0.291153	-0.133673	0.5	Intronic	0	0	1	0	0	2.6955	1.1905
Mut22	0	2.978	-2.729	0.4038	1.06625	1.06453	2.62658	0.47	Intronic	0	0	1	0	0	2.978	-2.729
Mut23	0	0	0.58075	-1.8616	0.0094997	0.926072	3.54919	0.96	Intronic	0	0	1	0	0	0	0.58075
Mut24	0	0.857	-1.4242	-2.5947	0.102262	0.140606	0.825518	0.99	Intronic	0	0	1	0	0	0.857	-1.4242
Mut25	0	0	-4.9435	1.2068	0.84231	0.448886	0.954698	0.98	Intronic	0	0	1	0	0	0	-4.9435
Mut26	0	0	-1.53533	-2.1221	0.00103776	0.0146286	-0.0775747	0.99	Intronic	0	0	1	0	0	0	-1.53533
Mut27	0	0	-1.3125	-1.8364	0.898652	0.0179421	-0.199784	1	Intronic	0	0	1	0	0	0	-1.3125
Mut28	0	0	0.217	-1.216	0.516702	0.337301	0.490896	1	Intronic	0	0	1	0	0	0	0.217
Mut29	0	0	-4.139	6.4661	0.771309	0.205385	-0.717174	0.08	Intronic	0	0	1	0	0	0	-4.139
Mut30	0	0	-1.2145	3.357	0.187068	0.0503019	0.298186	0.02	Intronic	0	0	1	0	0	0	-1.2145
Mut31	0	0	0.792	2.6019	0.677824	1.07977	1.08163	0.01	Intronic	0	0	1	0	0	0	0.792
Mut32	0	-2.582	2.528	8.0737	0.0829514	-0.24091	2.78663	0.1	Intronic	0	0	1	0	0	-2.582	2.528
Mut33	0	1.7776	0	-1.5564	1.45125	1.45631	2.40918	0.55	Intronic	0	0	1	0	0	1.7776	0
Mut34	0	3.7335	1.6625	3.4436	1.13367	0.516262	-0.200699	0.01	Double	1	0	1	3.7335	0.8705	0	0.792
Mut35	0	0	4.806	4.0332	0.944161	0.440424	-0.0421646	0	Double	1	0	1	0	2.638	0	2.168
Mut36	0.84	0	0.716	-1.1003	0.219943	0.122002	-0.0806324	0.95	Double	0	1	1	0	0.499	0	0.217
Mut37	0.84	0	1.291	-1.7059	1.30032	1.00509	1.42044	1	Double	0	1	1	0	0.499	0	0.792
Mut38	1.5	4.756	-1.161	-1.3983	0.0688918	0.0841033	0.712019	0.95	Double	0	0	1	0	0	4.756	-1.161
Mut39	1.5	3.899	0.579667	2.5741	3.32598	0.36105	-0.550679	1	Double	0	0	1	0	0	3.899	0.579667
Mut40	0	0.857	-1.30325	2.3895	0.768025	0.372721	-0.121342	0.98	Double	0	0	1	0	0	0.857	-1.30325
Mut41	0	0	-3.29667	4.1148	1.29279	0.338978	-0.774763	0.99	Double	0	0	1	0	0	0	-3.29667
Mut42	0	0	-0.359333	2.4451	0.756567	0.442626	0.183231	0.95	Double	0	0	1	0	0	0	-0.359333
Mut43	0	0	-1.16033	3.7063	2.01652	0.241025	-0.653435	0.98	Double	0	0	1	0	0	0	-1.16033
Mut44	0	0	-0.115667	9.2699	0.0806283	0.0657729	-0.160698	0.03	Double	0	0	1	0	0	0	-0.115667
Mut45	0	0	-0.12625	4.0316	0.384608	-0.330294	0.0563741	0.08	Double	0	0	1	0	0	0	-0.12625
Mut46	0	0	0.44175	9.3552	1.59857	0.168268	-1.20557	0.01	Double	0	0	1	0	0	0	0.44175
Mut47	0	0	1.5412	3.908	1.12621	0.760299	-0.114259	0	Double	0	0	1	0	0	0	1.5412

## Sheet: training_set_RBPfeatures
Training Set RBP features
MutID	SRSF1	SRSF2	SRSF9	SRSF10	PCBP2	RBM4	SRSF4	SRSF7	SRSF11	SFPQ	Inclusion	Exclusion
Mut1	4.28156	5.202	3.904	5.66125	0	0	0	0	3.17	0	4.7622	3.17
Mut2	9.3802	0	-1.007	9.88275	0	0	0	0	7.37	0	6.08532	7.37
Mut3	1.29	0	0	0	1.223	0	0	0	0	0	1.2565	0
Mut4	0	0	0	0	0	0	0	0	0	0	0	0
Mut5	-4.533	0	-1.486	0	3.433	0	0	0	-4.533	0	-0.862	-4.533
Mut6	-4.533	0	-1.486	0	0	0	0	1.058	-4.533	0	-3.0095	-1.7375
Mut7	2.14083	0	3.195	0	0	0	0	0	3.685	2.914	2.66792	3.2995
Mut8	-1.999	-3.614	1.199	0	0	0	0	0	-2.211	0	-1.47133	-2.211
Mut9	0.918	0	0	0	0	0	0	0	0	0	0.918	0
Mut10	0.0953333	0	0	-0.021	0	0	0	0	0	0	0.0371667	0
Mut11	-0.1175	0	0	-0.1175	0	0	0	0	0	0	-0.1175	0
Mut12	-2.524	0	0	-3.42	-3.252	-1.1795	-3.141	0	0	0	-2.59388	-3.141
Mut13	-3.616	0	-2.993	-4.154	3.2	-1.1795	-2.293	0	0	0	-1.7485	-2.293
Mut14	1.73975	2.215	-0.4395	-0.146	1.215	-1.1795	-3.141	0	2.211	0	0.567458	-0.465
Mut15	3.83062	8.74	-2.497	0.25	0	3.9635	-4.837	-0.376	5.896	1.656	2.85743	0.58475
Mut16	-1.792	0.193	2.784	0	0	0	-8.296	-0.216	-2.211	-1.812	0.395	-3.13375
Mut17	-2.0215	-0.775	0	0	0	0	-3.459	-0.376	-2.211	-1.003	-1.39825	-1.76225
Mut18	2.322	-0.775	0	0	0	0	0.53	0	2.322	-5.217	0.7735	-0.788333
Mut19	0.538	-0.421	0.2985	0	0	0	0	0	0	0	0.1385	0
Mut20	-0.874333	-0.421	-0.493	0	1.078	0	0	0	-2.211	0	-0.177583	-2.211
Mut21	-0.206	0	-0.493	0	-3.58	0	0	0	0	0	-1.42633	0
Mut22	-0.173	0	-0.493	0	-3.905	0	0	0	0	3.391	-1.52367	3.391
Mut23	0	0	0	0	0.584	0	0	0	0	0	0.584	0
Mut24	0	0	0	0	-2.599	0	3.459	0	0	0	-2.599	3.459
Mut25	0	0	0	0	-3.137	0.652	0	0	0	0	-1.2425	0
Mut26	0	0	0	0	-4.999	0	0	0	0	0	-4.999	0
Mut27	0	0	0	0	11.026	0	5.126	0	0	0	11.026	5.126
Mut28	0	0	1.643	0	-4.467	0	4.307	0	0	0	-1.412	4.307
Mut29	0	0	0	0	-0.677	0	0	0	0	0	-0.677	0
Mut30	0	0	0	0	-1.884	1.917	0	0	0	0	0.0165	0
Mut31	0	0	0	0	-4.467	0	0	0	0	0	-4.467	0
Mut32	0	0	0	0	0	-6.0185	-1.378	0	0	-3.953	-6.0185	-2.6655
Mut33	0.112	0	4.575	0	0	3.8635	2.727	0	0	-2.08	2.85017	0.3235
Mut34	2.14083	0	3.195	0	-4.467	0	0	0	3.685	2.914	0.289611	3.2995
Mut35	3.83062	8.74	-2.497	0.25	0	3.9635	-4.837	-0.376	5.896	1.656	2.85743	0.58475
Mut36	-1.792	0.193	4.427	0	-4.467	0	-3.989	-0.216	-2.211	-1.812	-0.40975	-2.057
Mut37	-1.792	0.193	2.784	0	-4.467	0	-8.296	-0.216	-2.211	-1.812	-0.8205	-3.13375
Mut38	0.538	-0.421	0.2985	0	-2.599	0	3.459	0	0	0	-0.545875	3.459
Mut39	0.538	-0.421	0.2985	0	-4.467	0	0	0	0	0	-1.01287	0
Mut40	0	0	0	0	-7.066	0	3.459	0	0	0	-7.066	3.459
Mut41	0	0	0	0	-7.604	2.036	0	0	0	0	-2.784	0
Mut42	0	0	0	0	-9.466	0	0	0	0	0	-9.466	0
Mut43	0	0	0	0	0.871	0	5.126	0	0	0	0.871	5.126
Mut44	0	0	0	0	0.414	0	0	0	0	0	0.414	0
Mut45	0	0	0	0	-4.467	0	0	0	0	0	-4.467	0
Mut46	0	0	0	0	-4.467	0	0	0	0	0	-4.467	0
Mut47	0	0	0	0	-4.467	0	2.929	0	0	0	-4.467	2.929

## Sheet: VUSs_features
VUS features
MutID	SS	Enhancer	Silencer	strucMean	strucSD	strucSkew	strucKurt	Label	isSynonymous	isNonSynonymous	isIntronic	ESE	ESS	ISE	ISS
SNP1	0	0.387	0	-0.5651	0.0416584	0.0956829	0.00170238	NonSynonymous	0	1	0	0.387	0	0	0
SNP2	0	0.2125	0	0.1781	0.307566	0.46508	0.698463	Synonymous	1	0	0	0.2125	0	0	0
SNP3	0	1.155	1.095	1.5421	0.238359	-0.312006	-0.469636	NonSynonymous	0	1	0	1.155	1.095	0	0
SNP4	0	0.0451667	-0.4415	0.3773	0.423045	0.148003	0.398047	Synonymous	1	0	0	0.0451667	-0.4415	0	0
SNP5	0	0.02875	-1.82175	-0.0888	0.296633	0.418441	1.04353	NonSynonymous	0	1	0	0.02875	-1.82175	0	0
SNP6	0	-0.499571	0.167667	0.1254	0.233343	0.242031	0.432375	NonSynonymous	0	1	0	-0.499571	0.167667	0	0
SNP7	0	-0.461143	2.72833	-0.0714	0.33592	0.686229	1.03847	NonSynonymous	0	1	0	-0.461143	2.72833	0	0
SNP8	0	1.689	-2.902	-0.1718	-0.0086982	0.0788739	0.35549	Synonymous	1	0	0	1.689	-2.902	0	0
SNP9	0	-3.58217	0.274	0.0018	0.0382958	0.106905	0.0361209	NonSynonymous	0	1	0	-3.58217	0.274	0	0
SNP10	0	-1.14286	3.40467	-1.58	-0.644465	1.35566	5.92547	Synonymous	1	0	0	-1.14286	3.40467	0	0
SNP11	0	-0.792333	0.6555	-2.4137	-1.42888	-0.0437538	3.59041	Synonymous	1	0	0	-0.792333	0.6555	0	0
SNP12	0	1.9176	-1.98967	-1.6302	-0.390937	1.33639	5.6052	NonSynonymous	0	1	0	1.9176	-1.98967	0	0
SNP13	0	-1.505	2.011	2.0384	2.21983	0.31198	-0.366459	NonSynonymous	0	1	0	-1.505	2.011	0	0
SNP14	0	-1.3984	-0.543	-0.2982	0.462565	0.643522	0.72821	Synonymous	1	0	0	-1.3984	-0.543	0	0
SNP15	0	2.062	-1.819	-0.9288	-0.201564	0.252522	0.67028	NonSynonymous	0	1	0	2.062	-1.819	0	0
SNP16	0	0.98825	-1.819	-1.1881	-0.429194	0.631248	2.28504	NonSynonymous	0	1	0	0.98825	-1.819	0	0
SNP17	0	-1.43467	-0.429	-2.1147	-1.19833	0.880519	3.25903	Synonymous	1	0	0	-1.43467	-0.429	0	0
SNP18	0	-1.0695	1.00375	-1.1225	-0.416384	0.326559	0.102516	NonSynonymous	0	1	0	-1.0695	1.00375	0	0
SNP19	0	-0.5495	1.978	1.1576	0.382043	0.238566	0.829787	Synonymous	1	0	0	-0.5495	1.978	0	0
SNP20	0	0.900667	3.27333	0.1787	0.566787	0.607662	0.935329	NonSynonymous	0	1	0	0.900667	3.27333	0	0
SNP21	0	0.565	-0.4655	3.0889	1.35995	-0.118582	-0.74385	NonSynonymous	0	1	0	0.565	-0.4655	0	0
SNP22	0	-1.153	0.6972	-2.0379	-1.07393	0.633953	4.89112	NonSynonymous	0	1	0	-1.153	0.6972	0	0
SNP23	0	0.3715	-1.181	2.1971	-0.0291679	-0.481208	0.452147	Synonymous	1	0	0	0.3715	-1.181	0	0
SNP24	0	-0.406667	1.13375	-1.6193	-1.47659	0.133227	1.74386	NonSynonymous	0	1	0	-0.406667	1.13375	0	0
SNP25	0	-0.40575	-1.855	-3.8185	-0.78509	2.06577	7.44764	NonSynonymous	0	1	0	-0.40575	-1.855	0	0
SNP26	0	0.98975	2.48975	0.6553	0.107103	1.53993	4.75944	Synonymous	1	0	0	0.98975	2.48975	0	0
SNP27	0	1.88367	-0.223	-2.2675	-1.32835	0.423976	7.21976	NonSynonymous	0	1	0	1.88367	-0.223	0	0
SNP28	0	1.891	2.97	-0.2041	0.184183	-0.408406	-0.188567	Synonymous	1	0	0	1.891	2.97	0	0
SNP29	-7.48	0	0	4.4025	2.63112	-0.156668	-0.312676	Intronic	0	0	1	0	0	0	0
SNP30	0	3.126	1.28	0.8502	-0.0340528	-0.136679	0.0918274	Intronic	0	0	1	0	0	3.126	1.28
SNP31	0	0	3.14767	0.2929	1.0244	1.06003	2.22965	Intronic	0	0	1	0	0	0	3.14767
SNP32	0	0	-0.94	1.2442	0.905032	0.619494	1.14841	Intronic	0	0	1	0	0	0	-0.94
SNP33	0	3.119	1.006	6.5151	-1.02993	-1.49547	0.681215	Intronic	0	0	1	0	0	3.119	1.006
SNP34	0	0	-0.25	-0.2746	-0.278931	0.0562117	-0.801776	Intronic	0	0	1	0	0	0	-0.25
SNP35	0	0	1.503	-1.2382	0.295088	1.39475	4.13343	Intronic	0	0	1	0	0	0	1.503
SNP36	0	2.592	0.938	5.5239	1.57753	-0.288385	0.0982315	Intronic	0	0	1	0	0	2.592	0.938
SNP37	0	-2.582	0	9.8207	-0.729271	-1.36086	7.10582	Intronic	0	0	1	0	0	-2.582	0
SNP38	0	0.260667	0	4.6855	-2.49709	-1.52073	3.62443	Intronic	0	0	1	0	0	0.260667	0
SNP39	0	-3.10783	-0.8246	-0.6568	0.0966876	0.280747	-0.177276	Intronic	0	0	1	0	0	-3.10783	-0.8246
SNP40	0	-1.395	1.509	-1.0469	-0.480364	0.393482	0.0850763	Intronic	0	0	1	0	0	-1.395	1.509
SNP41	0	2.875	0.524	-0.0441	0.226067	-0.128145	-0.346614	Intronic	0	0	1	0	0	2.875	0.524
SNP42	0	-1.053	1.5475	-0.1302	0.24779	0.290048	-0.000526198	Intronic	0	0	1	0	0	-1.053	1.5475
SNP43	0	0	2.4995	1.0672	0.835658	0.107864	-0.128033	Intronic	0	0	1	0	0	0	2.4995
SNP44	0	0.6612	-0.835333	5.5581	1.18184	-0.429797	-0.558805	Intronic	0	0	1	0	0	0.6612	-0.835333
SNP45	0	-1.71	2.28425	-0.0716	0.185842	0.0865141	-0.548528	Intronic	0	0	1	0	0	-1.71	2.28425
SNP46	0	0	-1.80933	1.5677	0.350936	-0.217276	-0.502352	Intronic	0	0	1	0	0	0	-1.80933
SNP47	0	-2.032	0	2.0825	0.0271697	-0.390306	0.522627	Intronic	0	0	1	0	0	-2.032	0
SNP48	0	-1.2885	-1.36767	1.6137	0.507083	-0.139889	-0.311924	Intronic	0	0	1	0	0	-1.2885	-1.36767
SNP49	0	0.4132	2.6045	-0.563	-0.0467248	0.407959	0.677845	Intronic	0	0	1	0	0	0.4132	2.6045
SNP50	0	1.3435	0	0.1232	0.198406	0.353479	0.568996	Intronic	0	0	1	0	0	1.3435	0
SNP51	0	0	2.597	1.0419	0.063887	-0.586704	-0.604622	Intronic	0	0	1	0	0	0	2.597
SNP52	0	2.7932	1.847	-0.7197	-0.200852	0.353727	-0.108094	Intronic	0	0	1	0	0	2.7932	1.847
SNP53	0	-3.087	2.619	-0.4505	-0.14707	0.0165177	-0.135928	Intronic	0	0	1	0	0	-3.087	2.619
SNP54	0	0.274333	-1.287	-0.4756	-0.117627	0.0884968	-0.235028	Intronic	0	0	1	0	0	0.274333	-1.287
SNP55	0	1.5345	-0.588	-1.3593	-0.46379	0.124547	0.341584	Intronic	0	0	1	0	0	1.5345	-0.588

## Sheet: Complete_Mutagensis_features
Complete Mutagenesis features
MutID	Pos1	WTbase	MUTbase	Label	SS	Enhancer	Silencer	strucMean	strucSD	strucSkew	strucKurt	isSynonymous	isNonSynonymous	isIntronic	ESE	ESS	ISE	ISS
ID130	-50	C	A	NonSynonymous	0	0.825333	-1.5245	0.5339	0.575747	0.203674	-0.129003	0	1	0	0.825333	-1.5245	0	0
ID131	-50	C	U	NonSynonymous	0	0.532667	1.73533	-0.5802	0.158391	0.763247	1.10801	0	1	0	0.532667	1.73533	0	0
ID132	-50	C	G	NonSynonymous	0	0.136	-1.3065	-1.8077	-0.416889	1.43892	5.03513	0	1	0	0.136	-1.3065	0	0
ID133	-49	C	A	Synonymous	0	2.5485	-0.07825	1.385	0.675784	0.115395	0.444562	1	0	0	2.5485	-0.07825	0	0
ID134	-49	C	U	Synonymous	0	-0.5495	1.978	1.3209	0.368011	-0.0985026	-0.634081	1	0	0	-0.5495	1.978	0	0
ID135	-49	C	G	Synonymous	0	2.5426	-0.205667	0.698	2.08682	0.821647	0.571487	1	0	0	2.5426	-0.205667	0	0
ID136	-48	A	U	NonSynonymous	0	-1.09133	1.431	-1.2745	-0.393739	1.01004	3.44485	0	1	0	-1.09133	1.431	0	0
ID137	-48	A	G	NonSynonymous	0	-1.09133	0.134	-1.6347	-0.523233	1.47125	5.93899	0	1	0	-1.09133	0.134	0	0
ID138	-48	A	C	NonSynonymous	0	-1.09133	-0.835	0.4943	0.220158	0.0366959	0.0887223	0	1	0	-1.09133	-0.835	0	0
ID139	-47	A	U	NonSynonymous	0	-1.09133	-1.04	-1.0764	-0.136002	0.787686	2.31313	0	1	0	-1.09133	-1.04	0	0
ID140	-47	A	G	NonSynonymous	0	-0.037	1.0446	-1.5115	-0.701126	0.991054	3.85327	0	1	0	-0.037	1.0446	0	0
ID141	-47	A	C	NonSynonymous	0	-0.21525	-1.29275	0.2609	0.102668	-0.239093	-0.532444	0	1	0	-0.21525	-1.29275	0	0
ID142	-46	G	A	Synonymous	0	2.4274	-1.366	-0.8549	0.271117	1.0038	2.23976	1	0	0	2.4274	-1.366	0	0
ID143	-46	G	U	NonSynonymous	0	-0.306333	-0.1258	-2.0331	-0.936205	0.92186	5.9995	0	1	0	-0.306333	-0.1258	0	0
ID144	-46	G	C	NonSynonymous	0	1.117	-1.54975	-1.1124	-0.0555433	1.25983	3.96392	0	1	0	1.117	-1.54975	0	0
ID145	-45	U	A	NonSynonymous	0	1.41733	-1.45575	-1.6509	-0.566759	0.800276	4.09995	0	1	0	1.41733	-1.45575	0	0
ID146	-45	U	G	NonSynonymous	0	-0.459	2.5794	-2.0826	-1.16617	0.890663	5.5834	0	1	0	-0.459	2.5794	0	0
ID147	-45	U	C	NonSynonymous	0	0.27025	-1.54075	3.7081	0.933648	-0.672243	-0.546289	0	1	0	0.27025	-1.54075	0	0
ID148	-44	G	A	NonSynonymous	0	1.74333	0.7425	6.9607	-0.355877	-2.30609	3.67536	0	1	0	1.74333	0.7425	0	0
ID149	-44	G	U	NonSynonymous	0	0.900667	3.27333	0.1515	0.56342	0.60625	0.861745	0	1	0	0.900667	3.27333	0	0
ID150	-44	G	C	NonSynonymous	0	0.604333	-0.433	-0.7062	0.444506	1.22074	2.77649	0	1	0	0.604333	-0.433	0	0
ID151	-43	U	A	NonSynonymous	0	1.224	-1.2824	-2.5156	-1.85677	-0.274862	3.27065	0	1	0	1.224	-1.2824	0	0
ID152	-43	U	G	NonSynonymous	0	-0.116	1.84343	-1.9346	-0.708866	1.13788	5.40172	0	1	0	-0.116	1.84343	0	0
ID153	-43	U	C	Synonymous	0	0.527	-1.5514	8.3152	-0.985434	-2.85103	8.0623	1	0	0	0.527	-1.5514	0	0
ID154	-42	G	A	NonSynonymous	0	1.017	1.184	-1.4837	-0.143797	1.13347	3.23699	0	1	0	1.017	1.184	0	0
ID155	-42	G	U	NonSynonymous	0	-1.153	0.6972	-0.9268	-0.161687	0.882753	2.35539	0	1	0	-1.153	0.6972	0	0
ID156	-42	G	C	NonSynonymous	0	0.565	-0.4655	3.1516	1.28523	-0.152573	-0.822422	0	1	0	0.565	-0.4655	0	0
ID157	-41	G	A	NonSynonymous	0	2.218	-0.60975	-0.4029	0.326797	0.540763	0.59325	0	1	0	2.218	-0.60975	0	0
ID158	-41	G	U	NonSynonymous	0	0.00366667	-0.543	1.4211	1.0334	0.412412	-0.236951	0	1	0	0.00366667	-0.543	0	0
ID159	-41	G	C	NonSynonymous	0	0.846667	-1.068	3.3729	0.103809	-0.504645	0.178219	0	1	0	0.846667	-1.068	0	0
ID160	-40	C	A	Synonymous	0	3.7335	0.8705	-1.392	-0.359421	0.752148	1.95706	1	0	0	3.7335	0.8705	0	0
ID161	-40	C	U	Synonymous	0	0.0833333	2.2785	-0.6015	0.136669	0.615311	0.988355	1	0	0	0.0833333	2.2785	0	0
ID162	-40	C	G	Synonymous	0	-0.46375	2.66183	-0.6608	0.22595	0.825207	1.26999	1	0	0	-0.46375	2.66183	0	0
ID163	-39	U	A	NonSynonymous	0	1.58383	-0.104	2.6262	0.328591	-0.725424	0.615837	0	1	0	1.58383	-0.104	0	0
ID164	-39	U	G	NonSynonymous	0	0.0546	-0.104	9.5608	-2.05438	-1.85182	4.39634	0	1	0	0.0546	-0.104	0	0
ID165	-39	U	C	NonSynonymous	0	0.386667	-0.104	-2.4985	-1.36269	0.812166	8.29992	0	1	0	0.386667	-0.104	0	0
ID166	-38	C	A	NonSynonymous	0	1.5655	0.99475	-1.0975	-0.374396	0.675821	1.42121	0	1	0	1.5655	0.99475	0	0
ID167	-38	C	U	NonSynonymous	0	-0.464667	0.1775	-0.508	-0.0682057	0.648183	1.24125	0	1	0	-0.464667	0.1775	0	0
ID168	-38	C	G	NonSynonymous	0	0.749	-0.104	-0.3089	-0.343126	0.605137	2.13373	0	1	0	0.749	-0.104	0	0
ID169	-37	A	U	Synonymous	0	-1.99863	1.50825	-0.5829	0.718253	0.823386	1.11393	1	0	0	-1.99863	1.50825	0	0
ID170	-37	A	G	Synonymous	0	-0.887857	-0.680667	-1.3171	0.103086	1.21858	3.20986	1	0	0	-0.887857	-0.680667	0	0
ID171	-37	A	C	Synonymous	0	-1.30286	-0.467	2.3508	0.931123	-0.110223	-0.801611	1	0	0	-1.30286	-0.467	0	0
ID172	-36	A	U	NonSynonymous	0	-2.50286	0.9666	3.0627	0.930802	-0.497472	-0.369312	0	1	0	-2.50286	0.9666	0	0
ID173	-36	A	G	NonSynonymous	0	-0.432429	-0.7405	0.412	0.236373	0.0650258	-0.511513	0	1	0	-0.432429	-0.7405	0	0
ID174	-36	A	C	NonSynonymous	0	-2.5275	-2.2355	1.2223	0.606285	-0.430807	-0.438324	0	1	0	-2.5275	-2.2355	0	0
ID175	-35	A	U	NonSynonymous	0	-1.30429	-3.7715	0.8655	0.678638	0.167732	0.233762	0	1	0	-1.30429	-3.7715	0	0
ID176	-35	A	G	NonSynonymous	0	-2.30914	3.291	5.6887	0.359117	-0.910385	-0.548331	0	1	0	-2.30914	3.291	0	0
ID177	-35	A	C	NonSynonymous	0	-1.51362	-3.682	1.5912	0.189305	-0.138053	0.0619247	0	1	0	-1.51362	-3.682	0	0
ID178	-34	G	A	Synonymous	0	1.89917	-2.86133	-0.1886	0.54091	0.488092	0.514331	1	0	0	1.89917	-2.86133	0	0
ID179	-34	G	U	NonSynonymous	0	-1.409	-4.19533	0.2277	0.517844	0.508175	0.5916	0	1	0	-1.409	-4.19533	0	0
ID180	-34	G	C	NonSynonymous	0	-0.42825	-4.08267	0.7545	2.50954	0.904155	0.476479	0	1	0	-0.42825	-4.08267	0	0
ID181	-33	G	A	NonSynonymous	0	1.80157	-3.29367	-2.2643	-1.26497	0.903271	5.30495	0	1	0	1.80157	-3.29367	0	0
ID182	-33	G	U	NonSynonymous	0	-2.45286	-0.844	5.3466	3.54329	-0.0838591	-1.32066	0	1	0	-2.45286	-0.844	0	0
ID183	-33	G	C	NonSynonymous	0	-1.46214	-3.601	3.7632	0.646669	-0.567252	-0.647172	0	1	0	-1.46214	-3.601	0	0
ID184	-32	A	U	NonSynonymous	0	-3.20286	2.8388	3.5201	2.05951	0.243719	-0.0770638	0	1	0	-3.20286	2.8388	0	0
ID185	-32	A	G	NonSynonymous	0	-4.22014	3.82325	-0.3339	0.167487	0.626507	1.2389	0	1	0	-4.22014	3.82325	0	0
ID186	-32	A	C	NonSynonymous	0	-2.97214	-1.74533	5.5599	3.32745	-0.108533	-1.24123	0	1	0	-2.97214	-1.74533	0	0
ID187	-31	U	A	NonSynonymous	0	5.05686	-1.71633	3.5873	1.20012	0.382077	0.680544	0	1	0	5.05686	-1.71633	0	0
ID188	-31	U	G	NonSynonymous	0	1.585	-2.421	-0.6568	0.13733	0.704986	1.13862	0	1	0	1.585	-2.421	0	0
ID189	-31	U	C	Synonymous	0	0.826	-3.81167	4.6423	1.61801	-0.177315	-0.435353	1	0	0	0.826	-3.81167	0	0
ID190	-30	A	U	NonSynonymous	0	-2.6465	-0.405333	-0.766	-0.0221038	0.860657	2.60734	0	1	0	-2.6465	-0.405333	0	0
ID191	-30	A	G	NonSynonymous	0	-0.513571	-1.74133	-0.8156	0.0487714	1.09161	3.18361	0	1	0	-0.513571	-1.74133	0	0
ID192	-30	A	C	NonSynonymous	0	-1.50283	-3.23133	0.8723	0.46519	0.165958	0.952857	0	1	0	-1.50283	-3.23133	0	0
ID193	-29	A	U	NonSynonymous	0	-2.51567	-1.65533	-0.4993	0.137274	0.643149	1.0178	0	1	0	-2.51567	-1.65533	0	0
ID194	-29	A	G	NonSynonymous	0	-2.62267	0.764	0.6223	0.969335	0.384534	-0.395936	0	1	0	-2.62267	0.764	0	0
ID195	-29	A	C	NonSynonymous	0	-2.05733	-2.14933	-0.3068	0.153834	0.667061	1.30199	0	1	0	-2.05733	-2.14933	0	0
ID196	-28	U	A	NonSynonymous	0	4.02386	0.501	-0.2909	0.0101891	0.346113	0.546203	0	1	0	4.02386	0.501	0	0
ID197	-28	U	G	NonSynonymous	0	0.677571	0.91625	0.1079	0.116065	0.242898	0.331657	0	1	0	0.677571	0.91625	0	0
ID198	-28	U	C	Synonymous	0	0.461625	-0.535	-0.1615	0.256511	0.305509	0.576319	1	0	0	0.461625	-0.535	0	0
ID199	-27	A	U	NonSynonymous	0	-2.0285	3.33367	-0.8101	-0.0820836	0.519084	1.27463	0	1	0	-2.0285	3.33367	0	0
ID200	-27	A	G	NonSynonymous	0	-2.39133	1.586	0.6373	0.480881	0.362879	0.120369	0	1	0	-2.39133	1.586	0	0
ID201	-27	A	C	NonSynonymous	0	-2.47583	-1.064	-0.0377	0.328527	0.300327	0.271139	0	1	0	-2.47583	-1.064	0	0
ID202	-26	U	A	NonSynonymous	0	0.531143	0	2.0064	-0.0922408	0.029122	1.07078	0	1	0	0.531143	0	0	0
ID203	-26	U	G	NonSynonymous	0	-0.566714	1.603	1.1182	0.147101	0.0463654	0.523871	0	1	0	-0.566714	1.603	0	0
ID204	-26	U	C	NonSynonymous	0	-1.18214	0.842	2.4215	-0.357985	-0.379824	1.93415	0	1	0	-1.18214	0.842	0	0
ID205	-25	C	A	Synonymous	0	0.651571	3.516	2.13	-0.491916	-0.624799	-0.281021	1	0	0	0.651571	3.516	0	0
ID206	-25	C	U	Synonymous	0	-2.03443	0.879	0.8442	-0.0105357	-0.259629	0.13664	1	0	0	-2.03443	0.879	0	0
ID207	-25	C	G	NonSynonymous	0	0.626375	0	0.6014	-0.0181595	0.367794	0.395348	0	1	0	0.626375	0	0	0
ID208	-24	A	U	NonSynonymous	0	-3.477	3.665	2.0371	0.967779	0.133148	-0.10544	0	1	0	-3.477	3.665	0	0
ID209	-24	A	G	NonSynonymous	0	-1.54875	0	0.5084	0.388053	0.409754	0.501377	0	1	0	-1.54875	0	0	0
ID210	-24	A	C	NonSynonymous	0	-2.23429	0	2.9028	0.516511	0.318113	1.28184	0	1	0	-2.23429	0	0	0
ID211	-23	A	U	NonSynonymous	0	-3.41933	0	1.2328	-0.955165	-0.296746	0.82362	0	1	0	-3.41933	0	0	0
ID212	-23	A	G	NonSynonymous	0	-1.6255	0	2.3194	0.157302	-0.028994	1.00369	0	1	0	-1.6255	0	0	0
ID213	-23	A	C	NonSynonymous	0	-3.26383	0	3.4031	0.674652	0.183419	1.26653	0	1	0	-3.26383	0	0	0
ID214	-22	A	U	NonSynonymous	0	-1.6174	0	0.0137	0.299555	0.798402	2.03597	0	1	0	-1.6174	0	0	0
ID215	-22	A	G	Synonymous	0	-0.79	0	0.7751	2.05986	0.429541	-0.157829	1	0	0	-0.79	0	0	0
ID216	-22	A	C	NonSynonymous	0	0.258167	0	-0.4034	1.0824	0.40574	0.319855	0	1	0	0.258167	0	0	0
ID217	-21	C	A	NonSynonymous	0	5.205	1.024	3.1285	-0.928885	-1.40461	2.45054	0	1	0	5.205	1.024	0	0
ID218	-21	C	U	NonSynonymous	0	0.6515	1.714	1.5996	0.116905	-0.503019	0.0888798	0	1	0	0.6515	1.714	0	0
ID219	-21	C	G	NonSynonymous	0	2.44683	0	1.0922	0.00225172	-0.229545	0.355515	0	1	0	2.44683	0	0	0
ID220	-20	A	U	NonSynonymous	0	-0.269	1.084	1.9557	-0.477153	-0.818628	-0.133663	0	1	0	-0.269	1.084	0	0
ID221	-20	A	G	NonSynonymous	0	-0.5746	-1.181	2.3944	-0.0235401	-0.776508	-0.213284	0	1	0	-0.5746	-1.181	0	0
ID222	-20	A	C	NonSynonymous	0	-0.6345	-1.181	4.4424	-0.658103	-0.113283	0.593718	0	1	0	-0.6345	-1.181	0	0
ID223	-19	C	A	NonSynonymous	0	3.83517	3.379	-0.9757	-1.29	1.57968	7.56548	0	1	0	3.83517	3.379	0	0
ID224	-19	C	U	Synonymous	0	0.3715	-1.181	1.2033	-0.111562	-0.122028	-0.452536	1	0	0	0.3715	-1.181	0	0
ID225	-19	C	G	NonSynonymous	0	0.361	2.1755	0.769	-0.902697	0.0801589	-0.0557843	0	1	0	0.361	2.1755	0	0
ID226	-18	G	A	NonSynonymous	0	1.24325	-1.181	0.008	1.54212	0.720719	0.382979	0	1	0	1.24325	-1.181	0	0
ID227	-18	G	U	NonSynonymous	0	0.652	1.361	1.8341	3.54862	0.283688	-0.69957	0	1	0	0.652	1.361	0	0
ID228	-18	G	C	NonSynonymous	0	0.091	-1.181	-0.7528	0.39135	1.00612	3.43894	0	1	0	0.091	-1.181	0	0
ID229	-17	U	A	NonSynonymous	0	1.35783	-0.81	-1.7047	-0.420714	0.802206	3.00466	0	1	0	1.35783	-0.81	0	0
ID230	-17	U	G	NonSynonymous	0	-1.64	-0.8945	1.2567	-2.41119	-1.33527	4.51573	0	1	0	-1.64	-0.8945	0	0
ID231	-17	U	C	NonSynonymous	0	-0.483333	-1.1775	2.545	0.481867	-0.255279	-1.45603	0	1	0	-0.483333	-1.1775	0	0
ID232	-16	C	A	Synonymous	0	0.388	-0.9555	1.8717	-1.50661	1.72236	12.7636	1	0	0	0.388	-0.9555	0	0
ID233	-16	C	U	Synonymous	0	-1.9555	1.8315	-0.4411	0.602089	0.519538	1.04699	1	0	0	-1.9555	1.8315	0	0
ID234	-16	C	G	Synonymous	0	-1.9555	-0.149	1.8694	-2.00157	0.184806	2.36202	1	0	0	-1.9555	-0.149	0	0
ID235	-15	C	A	NonSynonymous	0	1.72867	0.051	0.1384	-1.74132	-0.254923	-0.385852	0	1	0	1.72867	0.051	0	0
ID236	-15	C	U	NonSynonymous	0	-0.406667	1.13375	-1.8837	-1.87895	-0.164664	3.9149	0	1	0	-0.406667	1.13375	0	0
ID237	-15	C	G	NonSynonymous	0	0.47575	-0.341667	1.5043	-1.08327	0.127518	0.536113	0	1	0	0.47575	-0.341667	0	0
ID238	-14	C	A	NonSynonymous	0	1.19	1.6675	-3.6945	-2.25198	0.785952	9.09088	0	1	0	1.19	1.6675	0	0
ID239	-14	C	U	NonSynonymous	0	-0.129	2.55867	1.155	1.18149	-0.586899	-0.491244	0	1	0	-0.129	2.55867	0	0
ID240	-14	C	G	NonSynonymous	0	-0.4695	2.74533	0.6016	0.512908	0.349564	0.439485	0	1	0	-0.4695	2.74533	0	0
ID241	-13	G	A	Synonymous	0	2.01575	-1.81933	-1.0876	-1.45862	-0.580355	2.68516	1	0	0	2.01575	-1.81933	0	0
ID242	-13	G	U	Synonymous	0	1.9635	-0.1	-2.2199	0.57942	0.251667	-0.548021	1	0	0	1.9635	-0.1	0	0
ID243	-13	G	C	Synonymous	0	0.336333	-2.94167	0.4093	1.6974	0.183952	-1.19519	1	0	0	0.336333	-2.94167	0	0
ID244	-12	G	A	NonSynonymous	0	0.3862	-2.627	1.826	0.882487	-0.685422	-0.312863	0	1	0	0.3862	-2.627	0	0
ID245	-12	G	U	NonSynonymous	0	-1.65325	-3.35067	2.8939	-0.0613255	-0.086878	0.166251	0	1	0	-1.65325	-3.35067	0	0
ID246	-12	G	C	NonSynonymous	0	-1.4405	-2.97133	1.6401	-1.34441	-0.306621	1.69619	0	1	0	-1.4405	-2.97133	0	0
ID247	-11	G	A	NonSynonymous	0	0.145833	-3.2795	-1.0541	-0.167808	0.299707	-0.642031	0	1	0	0.145833	-3.2795	0	0
ID248	-11	G	U	NonSynonymous	0	-2.03675	0.9256	0.0584	-1.59622	-0.465197	1.65364	0	1	0	-2.03675	0.9256	0	0
ID249	-11	G	C	NonSynonymous	0	-1.4008	-4.361	1.8251	-2.08065	-1.51442	1.85105	0	1	0	-1.4008	-4.361	0	0
ID250	-10	A	U	Synonymous	0	-2.03675	2.20767	1.8482	-0.712384	0.416337	2.72911	1	0	0	-2.03675	2.20767	0	0
ID251	-10	A	G	Synonymous	0	-2.03675	6.858	0.0224	-1.50218	1.50922	5.53671	1	0	0	-2.03675	6.858	0	0
ID252	-10	A	C	Synonymous	0	-2.03675	-5.627	1.6439	-0.951624	1.78397	7.42957	1	0	0	-2.03675	-5.627	0	0
ID253	-9	G	A	NonSynonymous	0	1.11957	-0.128	-1.9632	-0.323904	-0.126482	-1.26432	0	1	0	1.11957	-0.128	0	0
ID254	-9	G	U	NonSynonymous	0	1.12225	0.8905	-2.0082	-0.430891	0.32126	1.47738	0	1	0	1.12225	0.8905	0	0
ID255	-9	G	C	NonSynonymous	0	0.23875	-3.028	-0.9072	-0.748053	0.861566	3.81328	0	1	0	0.23875	-3.028	0	0
ID256	-8	G	A	NonSynonymous	0	1.03125	0.333	-0.6353	0.333193	-0.63798	-1.00802	0	1	0	1.03125	0.333	0	0
ID257	-8	G	U	NonSynonymous	0	-0.40575	-1.855	-3.1285	0.305634	1.73677	4.17989	0	1	0	-0.40575	-1.855	0	0
ID258	-8	G	C	NonSynonymous	0	-1.63333	-1.81	-1.2232	0.790624	1.49108	2.4836	0	1	0	-1.63333	-1.81	0	0
ID259	-7	C	A	Synonymous	0	5.92233	2.352	0.4199	0.59763	0.119538	-0.303678	1	0	0	5.92233	2.352	0	0
ID260	-7	C	U	Synonymous	0	0.98975	2.48975	0.5858	0.0424557	1.71368	5.54938	1	0	0	0.98975	2.48975	0	0
ID261	-7	C	G	Synonymous	0	-1.21575	7.05767	6.0584	0.233918	-0.347242	-0.0280358	1	0	0	-1.21575	7.05767	0	0
ID262	-6	G	A	NonSynonymous	0	1.88367	-0.223	-2.3441	-1.33056	0.254755	6.86383	0	1	0	1.88367	-0.223	0	0
ID263	-6	G	U	NonSynonymous	0	1.5675	-0.223	-1.8174	0.800269	1.32213	4.48499	0	1	0	1.5675	-0.223	0	0
ID264	-6	G	C	NonSynonymous	0	0.725	-0.223	2.4824	1.01178	0.761322	1.23415	0	1	0	0.725	-0.223	0	0
ID265	-5	G	A	NonSynonymous	0	4.32	0.898	0.7081	0.124368	-0.0171552	-0.654236	0	1	0	4.32	0.898	0	0
ID266	-5	G	U	NonSynonymous	0	2.003	1.48	-0.337	-0.682611	1.16023	8.55966	0	1	0	2.003	1.48	0	0
ID267	-5	G	C	NonSynonymous	0	1.284	-0.223	1.2121	-0.936506	2.62032	15.6177	0	1	0	1.284	-0.223	0	0
ID268	-4	C	A	Synonymous	0	1.996	2.043	4.4592	1.22593	0.0445724	-0.564988	1	0	0	1.996	2.043	0	0
ID269	-4	C	U	Synonymous	0	1.891	2.97	-0.3927	0.625339	0.183191	-0.252978	1	0	0	1.891	2.97	0	0
ID270	-4	C	G	Synonymous	0	0	2.638	3.453	0.622173	0.791054	0.348173	1	0	0	0	2.638	0	0
ID271	-3	A	U	NonSynonymous	-1.12	0	0	-0.2347	0.519755	0.36765	0.138787	0	1	0	0	-0.223	0	0
ID272	-3	A	G	NonSynonymous	-0.91	0	0	1.6054	0.624472	-0.20662	-0.966868	0	1	0	0	-0.223	0	0
ID273	-3	A	C	NonSynonymous	0.46	0	0	1.0826	0.463419	0.591008	0.440024	0	1	0	0	-0.223	0	0
ID274	-2	G	A	NonSynonymous	0.84	0	0	-5.5516	0.634755	1.17422	3.42478	0	1	0	0	0.499	0	0
ID275	-2	G	U	NonSynonymous	0.39	0	0	-1.7654	0.402093	-0.0629363	0.462359	0	1	0	0	0	0	0
ID276	-2	G	C	NonSynonymous	0.98	0	0	0.7003	-0.0929444	-1.04081	1.35844	0	1	0	0	0	0	0
ID277	-1	U	A	NonSynonymous	0.4	0	0	-5.2017	0.13886	0.303955	0.780057	0	1	0	0	0	0	0
ID278	-1	U	G	NonSynonymous	2.29	0	0	-0.4313	0.992974	1.39364	3.33998	0	1	0	0	0	0	0
ID279	-1	U	C	Synonymous	1.24	0	0	-3.7786	-1.60945	-0.226571	5.87506	1	0	0	0	0	0	0
ID280	1	G	A	Intronic	-8.19	0	0	-3.5617	1.82473	1.12699	2.17	0	0	1	0	0	0	0
ID281	1	G	U	Intronic	-8.51	0	0	-1.1651	2.54165	-0.0986595	-0.583949	0	0	1	0	0	0	0
ID282	1	G	C	Intronic	-8.28	0	0	-5.0359	3.60568	1.08605	0.823849	0	0	1	0	0	0	0
ID283	2	U	A	Intronic	-8.19	0	0	-3.8858	1.1897	0.742279	1.87361	0	0	1	0	0	1.8425	0
ID284	2	U	G	Intronic	-7.65	0	0	2.8119	0.140536	0.94737	3.28479	0	0	1	0	0	4.162	0
ID285	2	U	C	Intronic	-7.76	0	0	-1.2268	1.67066	0.49955	0.930957	0	0	1	0	0	0	0
ID286	3	G	A	Intronic	1.5	0	0	-2.5506	0.325742	-0.0108531	2.398	0	0	1	0	0	3.899	0.155
ID287	3	G	U	Intronic	-11.93	0	0	-0.5962	0.417375	0.0105502	0.672947	0	0	1	0	0	3.369	0
ID288	3	G	C	Intronic	-7.48	0	0	4.2433	1.20954	-0.284278	-0.421073	0	0	1	0	0	0	0
ID289	4	A	U	Intronic	-6.28	0	0	-2.3396	-0.448549	0.62856	3.74446	0	0	1	0	0	2.07667	-1.733
ID290	4	A	G	Intronic	-6.67	0	0	2.0966	0.776588	0.238479	0.312998	0	0	1	0	0	1.9165	-0.956
ID291	4	A	C	Intronic	-3.82	0	0	9.7132	3.28627	-0.605879	-0.13021	0	0	1	0	0	0	-0.814
ID292	5	G	A	Intronic	-10.75	0	0	1.1477	-0.0860727	-0.11945	-0.138069	0	0	1	0	0	0	1.503
ID293	5	G	U	Intronic	-11.21	0	0	1.4442	-0.143876	-0.15232	-0.27184	0	0	1	0	0	1.694	-1.328
ID294	5	G	C	Intronic	-7.21	0	0	0.1918	-0.122582	-0.183313	-0.223149	0	0	1	0	0	0.729	-0.174
ID295	6	U	A	Intronic	-5.25	0	0	0.832	-0.116595	-0.0861737	-0.0342901	0	0	1	0	0	0	3.255
ID296	6	U	G	Intronic	-4.09	0	0	2.0389	-0.378631	-0.642246	-0.0286548	0	0	1	0	0	3.1605	1.073
ID297	6	U	C	Intronic	-3.23	0	0	0.0898	0.0169317	-0.239533	-0.997363	0	0	1	0	0	0	2.94867
ID298	7	A	U	Intronic	0	1.254	-0.7815	0.8896	-0.0317907	-0.0680589	0.252532	0	0	1	0	0	1.254	-0.7815
ID299	7	A	G	Intronic	0	1.0845	-2.887	0.5688	0.12261	0.192273	0.523353	0	0	1	0	0	1.0845	-2.887
ID300	7	A	C	Intronic	0	0	-0.373	0.1041	0.430362	0.303697	0.0451001	0	0	1	0	0	0	-0.373
ID301	8	C	A	Intronic	0	3.126	1.28	-0.0996	0.265215	0.163841	-0.282112	0	0	1	0	0	3.126	1.28
ID302	8	C	U	Intronic	0	2.6955	1.1905	0.8454	0.0421815	0.0801048	0.492048	0	0	1	0	0	2.6955	1.1905
ID303	8	C	G	Intronic	0	3.398	0.0876667	0.8576	0.0481463	0.0051378	0.295616	0	0	1	0	0	3.398	0.0876667
ID304	9	C	A	Intronic	0	0	0.0676	-0.9935	0.221767	0.864565	3.02516	0	0	1	0	0	0	0.0676
ID305	9	C	U	Intronic	0	2.978	-2.729	0.4795	1.05991	1.05297	2.61903	0	0	1	0	0	2.978	-2.729
ID306	9	C	G	Intronic	0	1.201	-3.083	-0.2508	0.258974	0.660622	1.70102	0	0	1	0	0	1.201	-3.083
ID307	10	U	A	Intronic	0	0	-3.589	0.8489	0.867629	0.696161	1.49038	0	0	1	0	0	0	-3.589
ID308	10	U	G	Intronic	0	3.126	-3.175	0.2916	0.326964	0.443369	0.731058	0	0	1	0	0	3.126	-3.175
ID309	10	U	C	Intronic	0	0	-3.2255	2.1951	0.241351	0.272906	-0.168855	0	0	1	0	0	0	-3.2255
ID310	11	U	A	Intronic	0	0	0.377429	-2.6423	0.464882	0.964946	2.58698	0	0	1	0	0	0	0.377429
ID311	11	U	G	Intronic	0	0.936	-0.3592	-1.8488	1.19523	1.19718	3.0957	0	0	1	0	0	0.936	-0.3592
ID312	11	U	C	Intronic	0	0	0.58075	-1.7132	0.053727	1.01286	3.61021	0	0	1	0	0	0	0.58075
ID313	12	C	A	Intronic	0	1.387	-0.815333	-4.4195	0.435872	0.55523	1.11495	0	0	1	0	0	1.387	-0.815333
ID314	12	C	U	Intronic	0	0.857	-1.4242	-2.5173	0.173202	0.279191	1.00347	0	0	1	0	0	0.857	-1.4242
ID315	12	C	G	Intronic	0	0	-3.23667	1.9783	1.8455	-0.365616	-0.0743801	0	0	1	0	0	0	-3.23667
ID316	13	A	U	Intronic	0	1.629	-3.038	-2.6554	-0.751378	0.16568	4.30662	0	0	1	0	0	1.629	-3.038
ID317	13	A	G	Intronic	0	0	-4.9435	-0.3191	0.795698	0.658987	1.55452	0	0	1	0	0	0	-4.9435
ID318	13	A	C	Intronic	0	0	-3.1625	-0.4169	2.43403	0.524034	0.24133	0	0	1	0	0	0	-3.1625
ID319	14	C	A	Intronic	0	0.937	2.51933	-3.5962	0.508532	1.18065	4.07249	0	0	1	0	0	0.937	2.51933
ID320	14	C	U	Intronic	0	0	-1.53533	-2.1095	0.064737	0.031444	0.0491538	0	0	1	0	0	0	-1.53533
ID321	14	C	G	Intronic	0	1.089	-0.3476	-5.1227	-0.196842	1.618	7.55645	0	0	1	0	0	1.089	-0.3476
ID322	15	A	U	Intronic	0	0	-0.2565	0.7377	0.325989	-0.256626	1.06124	0	0	1	0	0	0	-0.2565
ID323	15	A	G	Intronic	0	2.079	-1.03533	-0.5478	0.699687	0.282345	0.197765	0	0	1	0	0	2.079	-1.03533
ID324	15	A	C	Intronic	0	0	-1.3125	-1.9243	0.837566	0.0229891	-0.22996	0	0	1	0	0	0	-1.3125
ID325	16	C	A	Intronic	0	0	-3.786	2.1957	-0.00268032	-0.110849	3.68293	0	0	1	0	0	0	-3.786
ID326	16	C	U	Intronic	0	0	0.217	-1.3688	0.45096	0.30273	0.324378	0	0	1	0	0	0	0.217
ID327	16	C	G	Intronic	0	0.875	0.69975	7.1971	3.069	-0.245983	-0.878607	0	0	1	0	0	0.875	0.69975
ID328	17	G	A	Intronic	0	0	2.168	3.0838	-0.403208	-0.66215	2.75339	0	0	1	0	0	0	2.168
ID329	17	G	U	Intronic	0	0	3.14767	0.2734	0.929312	1.13067	2.69919	0	0	1	0	0	0	3.14767
ID330	17	G	C	Intronic	0	0	3.9895	-0.0259	0.746837	0.493607	1.34291	0	0	1	0	0	0	3.9895
ID331	18	U	A	Intronic	0	0	0.22725	-1.4142	-0.392694	1.61081	5.5396	0	0	1	0	0	0	0.22725
ID332	18	U	G	Intronic	0	0	-0.855	2.489	2.14852	0.598917	-0.357421	0	0	1	0	0	0	-0.855
ID333	18	U	C	Intronic	0	0	-1.2145	3.9354	1.20119	0.141028	-0.592049	0	0	1	0	0	0	-1.2145
ID334	19	C	A	Intronic	0	0	0.8618	-0.5569	0.719057	0.912276	2.50984	0	0	1	0	0	0	0.8618
ID335	19	C	U	Intronic	0	0	-0.697333	-0.5716	1.01439	1.28403	3.20242	0	0	1	0	0	0	-0.697333
ID336	19	C	G	Intronic	0	0	0.792	3.5453	0.842456	0.649402	0.0586672	0	0	1	0	0	0	0.792
ID337	20	C	A	Intronic	0	0	3.04533	1.9457	1.64666	0.892065	0.796698	0	0	1	0	0	0	3.04533
ID338	20	C	U	Intronic	0	0	-1.882	0.2003	1.18688	0.356527	0.509542	0	0	1	0	0	0	-1.882
ID339	20	C	G	Intronic	0	0	-0.481	4.8646	0.836673	0.326665	-0.770638	0	0	1	0	0	0	-0.481
ID340	21	C	A	Intronic	0	0	0.86375	1.1931	0.182064	0.0288232	0.870365	0	0	1	0	0	0	0.86375
ID341	21	C	U	Intronic	0	0	-0.172	5.2868	0.92387	-0.292214	1.18802	0	0	1	0	0	0	-0.172
ID342	21	C	G	Intronic	0	0	-0.154667	0.2408	-0.333947	0.817914	0.780565	0	0	1	0	0	0	-0.154667
ID343	22	A	U	Intronic	0	1.358	-1.3455	2.9269	-0.975068	-0.851832	0.213078	0	0	1	0	0	1.358	-1.3455
ID344	22	A	G	Intronic	0	0	-1.193	2.653	-0.643466	-0.0752501	0.804892	0	0	1	0	0	0	-1.193
ID345	22	A	C	Intronic	0	0	-0.4445	-0.2386	-1.07114	0.112473	1.5497	0	0	1	0	0	0	-0.4445
ID346	23	U	A	Intronic	0	0	-0.3965	0.3149	2.13995	1.08756	0.933489	0	0	1	0	0	0	-0.3965
ID347	23	U	G	Intronic	0	0	0.4535	2.0362	1.97831	0.371207	-0.102735	0	0	1	0	0	0	0.4535
ID348	23	U	C	Intronic	0	0	-0.94	1.229	0.969243	0.523935	0.958672	0	0	1	0	0	0	-0.94
ID349	24	G	A	Intronic	0	1.358	0.5155	0.6909	0.981004	0.9556	1.99427	0	0	1	0	0	1.358	0.5155
ID350	24	G	U	Intronic	0	0	-0.94	-0.7472	-0.265236	1.77132	7.01902	0	0	1	0	0	0	-0.94
ID351	24	G	C	Intronic	0	0	0.2	1.2493	-1.70432	-0.777533	3.46974	0	0	1	0	0	0	0.2
ID352	25	C	A	Intronic	0	0	2.433	7.5665	-0.504876	-2.12004	4.23668	0	0	1	0	0	0	2.433
ID353	25	C	U	Intronic	0	0	-0.25	-0.3601	-0.24912	0.0953109	-0.66182	0	0	1	0	0	0	-0.25
ID354	25	C	G	Intronic	0	3.119	1.006	6.468	-1.01607	-1.47314	0.605757	0	0	1	0	0	3.119	1.006
ID355	26	G	A	Intronic	0	0	1.503	-1.3939	0.191846	1.56019	4.87337	0	0	1	0	0	0	1.503
ID356	26	G	U	Intronic	0	0	1.0645	-3.4245	-2.55902	-0.54607	2.69779	0	0	1	0	0	0	1.0645
ID357	26	G	C	Intronic	0	0	0.37	-1.117	-2.29163	-0.878753	0.780702	0	0	1	0	0	0	0.37
ID358	27	C	A	Intronic	0	0	3.3275	0.423	0.299927	1.25828	3.06236	0	0	1	0	0	0	3.3275
ID359	27	C	U	Intronic	0	3.43	-0.199	-2.4147	-2.6002	2.8458	44.4109	0	0	1	0	0	3.43	-0.199
ID360	27	C	G	Intronic	0	1.7825	0.708	1.8231	0.897365	0.682427	0.788362	0	0	1	0	0	1.7825	0.708
ID361	28	C	A	Intronic	0	2.592	0.938	5.548	1.43099	-0.335173	0.144197	0	0	1	0	0	2.592	0.938
ID362	28	C	U	Intronic	0	1.108	0	3.6318	0.388363	0.106471	0.434393	0	0	1	0	0	1.108	0
ID363	28	C	G	Intronic	0	2.3205	0	0.1099	-1.98858	-0.219176	4.43221	0	0	1	0	0	2.3205	0
ID364	29	G	A	Intronic	0	-2.582	2.528	6.9246	0.25303	-1.34005	2.6725	0	0	1	0	0	-2.582	2.528
ID365	29	G	U	Intronic	0	-2.582	0	0.2241	-0.159425	1.74876	7.42988	0	0	1	0	0	-2.582	0
ID366	29	G	C	Intronic	0	-2.582	0	0.0562	-1.52763	1.92227	13.1461	0	0	1	0	0	-2.582	0
ID367	30	U	A	Intronic	0	-0.4645	0	2.3767	2.76422	1.02306	1.27614	0	0	1	0	0	-0.4645	0
ID368	30	U	G	Intronic	0	0.260667	0	4.5941	-2.56515	-1.47521	0.764367	0	0	1	0	0	0.260667	0
ID369	30	U	C	Intronic	0	-2.582	0	10.7165	-0.268706	0.480744	2.8732	0	0	1	0	0	-2.582	0
ID370	31	G	A	Intronic	0	0.657	0	-1.5729	-0.674044	1.11118	4.36294	0	0	1	0	0	0.657	0
ID371	31	G	U	Intronic	0	-1.108	0	0.4674	0.0068816	0.875817	1.87717	0	0	1	0	0	-1.108	0
ID372	31	G	C	Intronic	0	-3.69	0	3.9101	-0.808871	1.52783	3.22136	0	0	1	0	0	-3.69	0
ID373	32	C	A	Intronic	0	1.98233	1.503	1.0712	-2.53104	-1.69933	1.73447	0	0	1	0	0	1.98233	1.503
ID374	32	C	U	Intronic	0	4.1728	0	-1.122	-0.911743	0.391595	2.76065	0	0	1	0	0	4.1728	0
ID375	32	C	G	Intronic	0	5.4925	0.915	1.3	-2.50919	-1.87586	2.58522	0	0	1	0	0	5.4925	0.915
ID376	33	U	A	Intronic	0	0.36875	1.11	3.6178	1.43568	0.127749	-0.0630422	0	0	1	0	0	0.36875	1.11
ID377	33	U	G	Intronic	0	1.7776	0	-1.5453	1.54061	1.40095	2.20636	0	0	1	0	0	1.7776	0
ID378	33	U	C	Intronic	0	-3.0835	0	-0.5127	-0.411134	1.99178	9.05681	0	0	1	0	0	-3.0835	0
ID379	34	G	A	Intronic	0	-0.7992	1.699	5.665	0.680111	-0.931455	-0.233097	0	0	1	0	0	-0.7992	1.699
ID380	34	G	U	Intronic	0	0.6716	0	3.0815	-0.843376	-0.917829	3.36919	0	0	1	0	0	0.6716	0
ID381	34	G	C	Intronic	0	-2.50867	0.845	2.505	0.366961	-0.390689	0.811523	0	0	1	0	0	-2.50867	0.845
ID382	35	U	A	Intronic	0	-0.4408	1.59	0.5849	0.160641	0.273536	-0.615789	0	0	1	0	0	-0.4408	1.59
ID383	35	U	G	Intronic	0	1.62633	-0.118	-0.3289	0.190519	2.37017	8.16822	0	0	1	0	0	1.62633	-0.118
ID384	35	U	C	Intronic	0	-1.38875	1.103	-0.2273	0.0955429	1.21118	2.63891	0	0	1	0	0	-1.38875	1.103
ID385	36	G	A	Intronic	0	-0.42375	2.463	0.8343	0.793367	-0.439143	-0.208567	0	0	1	0	0	-0.42375	2.463
ID386	36	G	U	Intronic	0	0.389333	-0.251	1.4354	1.31816	0.0162123	-0.356416	0	0	1	0	0	0.389333	-0.251
ID387	36	G	C	Intronic	0	-2.226	1.079	-0.2602	0.324663	-0.114934	0.0898017	0	0	1	0	0	-2.226	1.079
ID388	37	G	A	Intronic	0	-1.85667	0.956333	0.8136	0.000717731	-0.426105	-0.815726	0	0	1	0	0	-1.85667	0.956333
ID389	37	G	U	Intronic	0	0.444	-0.178	-1.6167	0.0717842	1.21884	2.74012	0	0	1	0	0	0.444	-0.178
ID390	37	G	C	Intronic	0	-1.85667	-0.459	1.2118	1.44447	-0.0784853	-0.308053	0	0	1	0	0	-1.85667	-0.459
ID391	38	C	A	Intronic	0	2.0622	0.728333	0.5784	-0.263091	0.308532	0.734469	0	0	1	0	0	2.0622	0.728333
ID392	38	C	U	Intronic	0	5.0404	-0.6785	0.1586	0.428043	0.00569458	0.215432	0	0	1	0	0	5.0404	-0.6785
ID393	38	C	G	Intronic	0	5.50067	-0.854	2.1211	1.06573	-0.304634	-0.705595	0	0	1	0	0	5.50067	-0.854
ID394	39	U	A	Intronic	0	0.69	2.57067	1.3911	1.27084	0.950425	2.07819	0	0	1	0	0	0.69	2.57067
ID395	39	U	G	Intronic	0	1.27767	0.982667	-0.2215	0.0409626	1.88044	5.99696	0	0	1	0	0	1.27767	0.982667
ID396	39	U	C	Intronic	0	0.016	1.028	1.4121	0.262776	-0.291627	0.111721	0	0	1	0	0	0.016	1.028
ID397	40	U	A	Intronic	0	0	0.435667	-0.0165	0.126834	-0.280639	-0.426095	0	0	1	0	0	0	0.435667
ID398	40	U	G	Intronic	0	2.72975	0.876	3.7429	-1.72625	-1.31863	4.90779	0	0	1	0	0	2.72975	0.876
ID399	40	U	C	Intronic	0	0	-0.397	-0.2583	0.658853	0.151258	-0.3597	0	0	1	0	0	0	-0.397
ID400	41	G	A	Intronic	0	0	0.387	1.2191	0.651405	-0.0854303	-0.188834	0	0	1	0	0	0	0.387
ID401	41	G	U	Intronic	0	0	0.704	0.9534	0.481283	-0.0517503	0.125949	0	0	1	0	0	0	0.704
ID402	41	G	C	Intronic	0	0	1.42767	1.833	0.573268	-0.100966	0.597353	0	0	1	0	0	0	1.42767
ID403	42	A	U	Intronic	0	5.264	-1.16633	0.3082	0.552276	0.987689	2.10623	0	0	1	0	0	5.264	-1.16633
ID404	42	A	G	Intronic	0	1.707	-0.923	3.7434	-0.0368575	-0.314574	2.26489	0	0	1	0	0	1.707	-0.923
ID405	42	A	C	Intronic	0	0	-0.53525	1.5122	0.980182	0.596121	0.867538	0	0	1	0	0	0	-0.53525
ID406	43	A	U	Intronic	0	0	-0.435	0.1319	0.253432	0.235866	0.891339	0	0	1	0	0	0	-0.435
ID407	43	A	G	Intronic	0	4.174	-1.03033	-1.4074	-0.204345	0.860149	2.41247	0	0	1	0	0	4.174	-1.03033
ID408	43	A	C	Intronic	0	0	-1.42933	-1.5703	-0.432631	1.21842	5.04623	0	0	1	0	0	0	-1.42933
ID409	44	U	A	Intronic	0	0	2.2924	-0.1528	0.415398	0.855364	1.77696	0	0	1	0	0	0	2.2924
ID410	44	U	G	Intronic	0	4.13267	-0.194	2.8226	-0.171079	-0.298994	1.7461	0	0	1	0	0	4.13267	-0.194
ID411	44	U	C	Intronic	0	0	1.47675	0.2817	0.466093	0.396212	0.541749	0	0	1	0	0	0	1.47675
ID412	45	U	A	Intronic	0	0.344	0.8254	0.5361	0.602705	0.362616	0.627445	0	0	1	0	0	0.344	0.8254
ID413	45	U	G	Intronic	0	0.501	-0.48025	0.983	0.529818	0.52298	0.915559	0	0	1	0	0	0.501	-0.48025
ID414	45	U	C	Intronic	0	-0.478	-0.580667	0.3697	0.437062	0.0891508	-0.428006	0	0	1	0	0	-0.478	-0.580667
ID415	46	A	U	Intronic	0	1.8304	2.61875	-1.0759	-0.494917	0.331994	0.154106	0	0	1	0	0	1.8304	2.61875
ID416	46	A	G	Intronic	0	2.349	-1.57	-1.7008	-0.26709	1.04858	3.60031	0	0	1	0	0	2.349	-1.57
ID417	46	A	C	Intronic	0	-1.128	-0.86875	0.6967	0.568619	0.432468	0.587292	0	0	1	0	0	-1.128	-0.86875
ID418	47	U	A	Intronic	0	-1.496	1.18033	-1.0311	-0.112933	0.483175	0.18659	0	0	1	0	0	-1.496	1.18033
ID419	47	U	G	Intronic	0	0.7324	-0.141667	0.9026	1.09849	0.452381	1.26682	0	0	1	0	0	0.7324	-0.141667
ID420	47	U	C	Intronic	0	-3.212	-1.25033	0.7049	-0.187428	-0.0837814	-0.365472	0	0	1	0	0	-3.212	-1.25033
ID421	48	U	A	Intronic	0	-0.4624	1.31467	0.3229	0.625136	0.402646	0.755502	0	0	1	0	0	-0.4624	1.31467
ID422	48	U	G	Intronic	0	0.618667	-1.03967	0.4209	0.870343	1.06596	3.21079	0	0	1	0	0	0.618667	-1.03967
ID423	48	U	C	Intronic	0	-2.5068	-0.3558	1.2087	0.385856	-0.0511755	0.466398	0	0	1	0	0	-2.5068	-0.3558
ID424	49	A	U	Intronic	0	-0.137714	-3.34233	1.2094	-0.16034	-0.0529643	-0.335913	0	0	1	0	0	-0.137714	-3.34233
ID425	49	A	G	Intronic	0	1.98	-1.7955	2.4093	6.24329	0.295588	-1.119	0	0	1	0	0	1.98	-1.7955
ID426	49	A	C	Intronic	0	-1.24533	-2.56625	1.1711	-0.374414	-0.273866	-0.436468	0	0	1	0	0	-1.24533	-2.56625
ID427	50	G	A	Intronic	0	-2.99467	-1.0845	-0.0736	0.258168	0.53364	0.916457	0	0	1	0	0	-2.99467	-1.0845
ID428	50	G	U	Intronic	0	-3.7245	-2.11125	0.8438	-0.449155	-0.182985	-0.68661	0	0	1	0	0	-3.7245	-2.11125
ID429	50	G	C	Intronic	0	-3.10783	-0.8246	-0.7006	0.0631823	0.34397	-0.216515	0	0	1	0	0	-3.10783	-0.8246
