# Supplementary figures and images for: Quantitative prediction of variant effects on alternative splicing in MAPT using endogenous pre-messenger RNA structure probing
Source: eLife journal article supplement (doi:10.7554/elife.73888), 2022-06-13

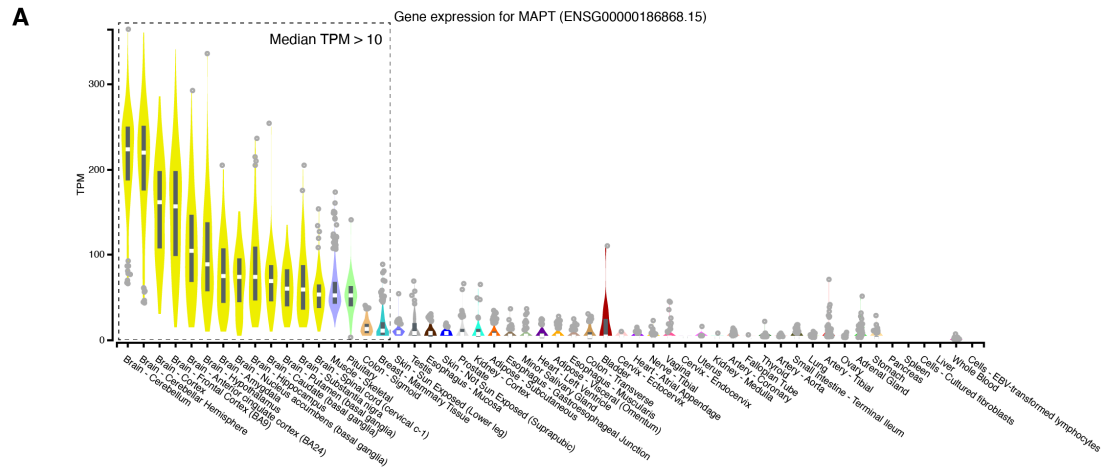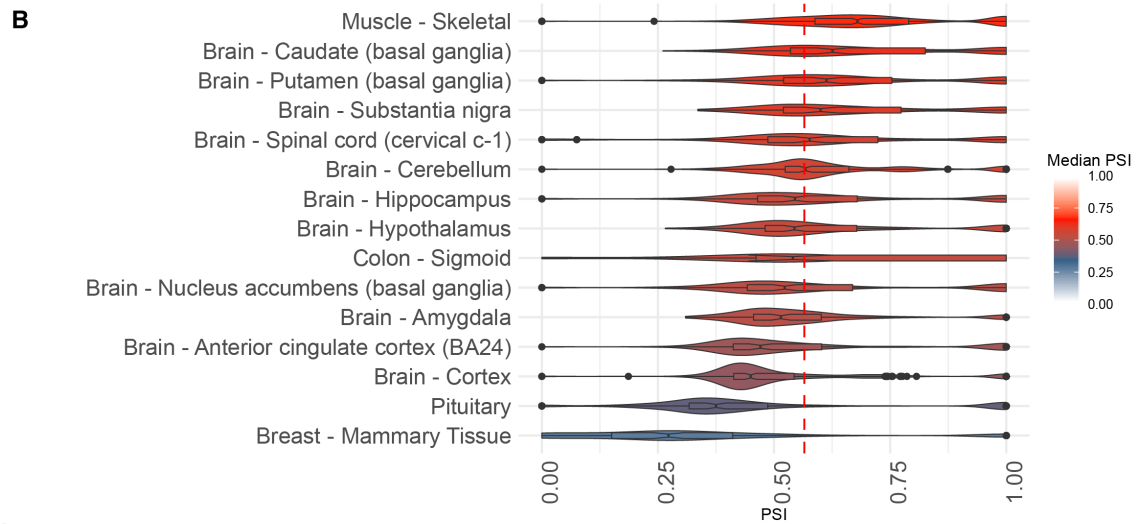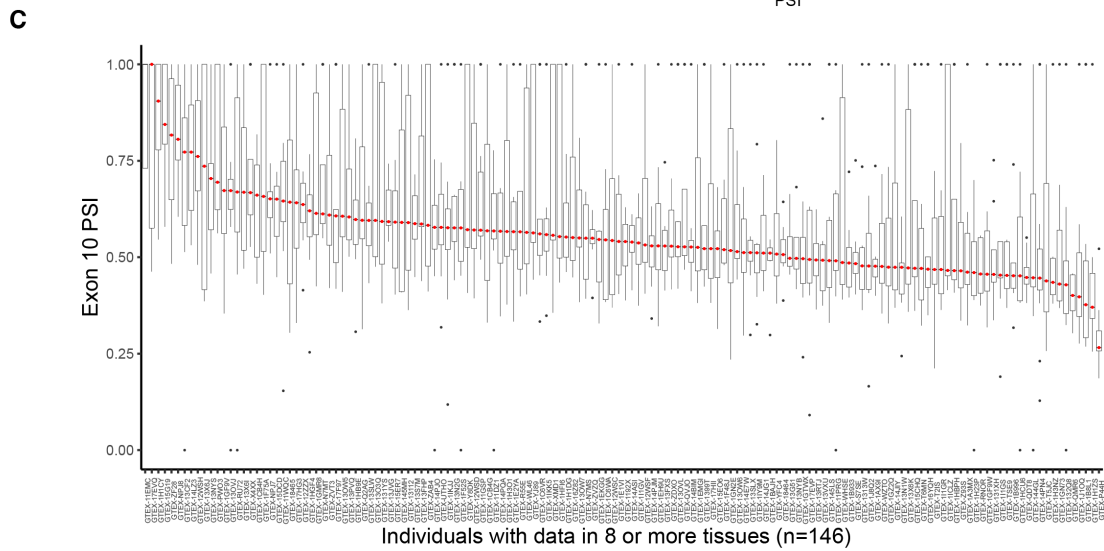

Supplement: supp [file elife_poa_e73888_Figure_1_figure_supplement_1.pdf › elife_poa_e73888_Figure_1_figure_supplement_1.pdf]

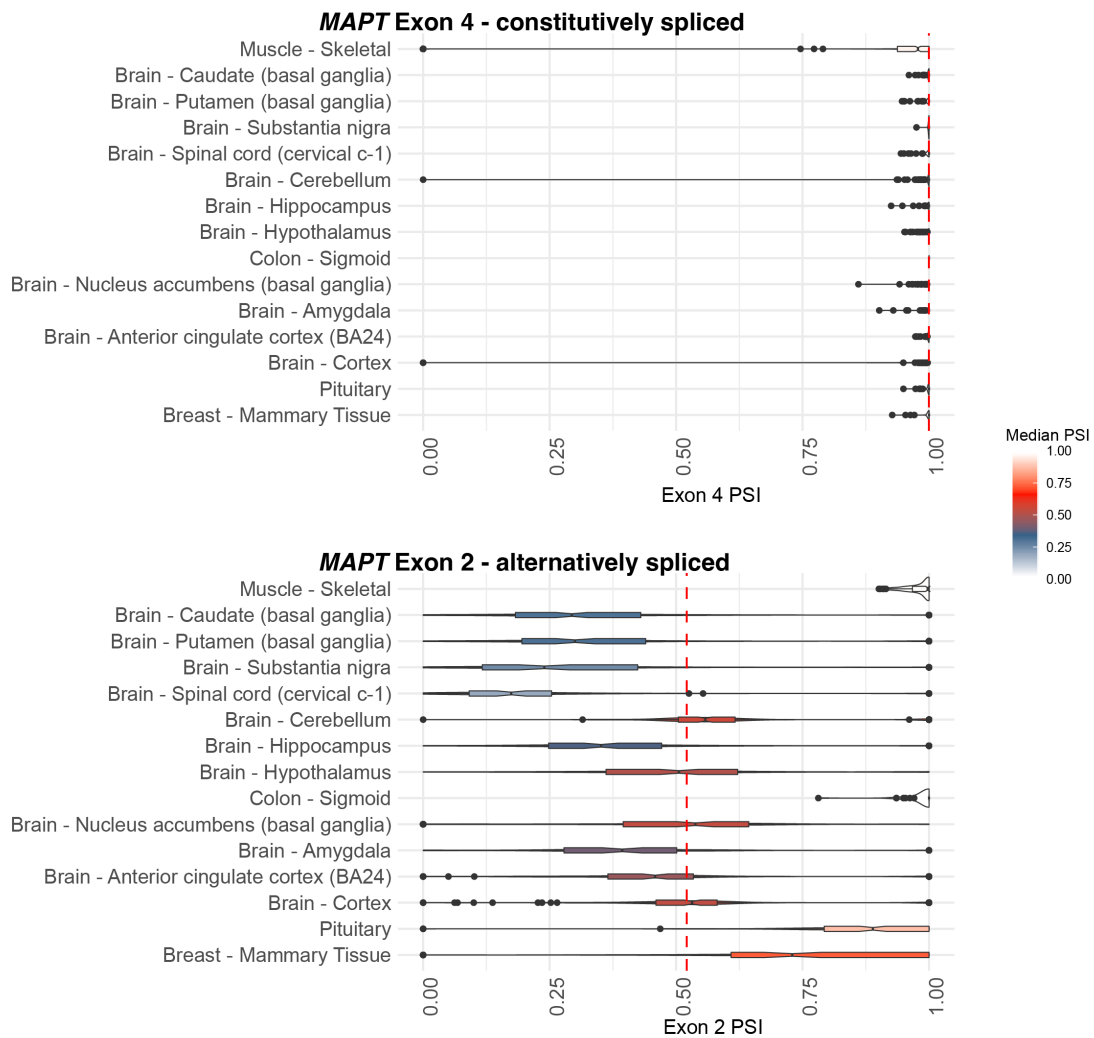

Supplement: supp [file elife_poa_e73888_Figure_1_figure_supplement_2.pdf › elife_poa_e73888_Figure_1_figure_supplement_2.pdf]

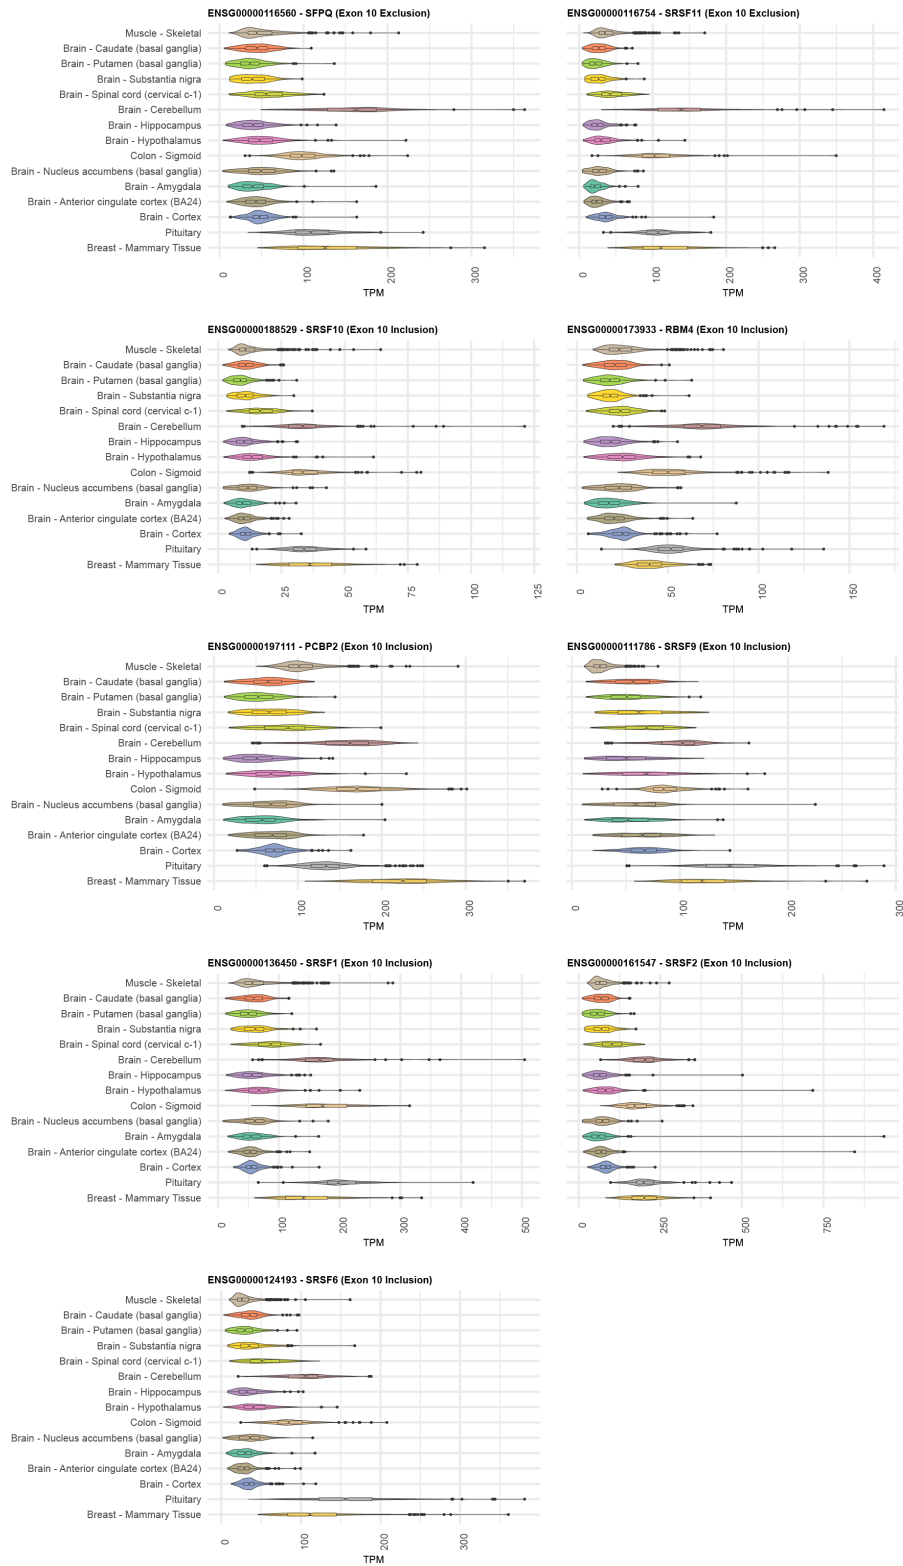

Supplement: supp [file elife_poa_e73888_Figure_1_figure_supplement_3.pdf › elife_poa_e73888_Figure_1_figure_supplement_3.pdf]

**A**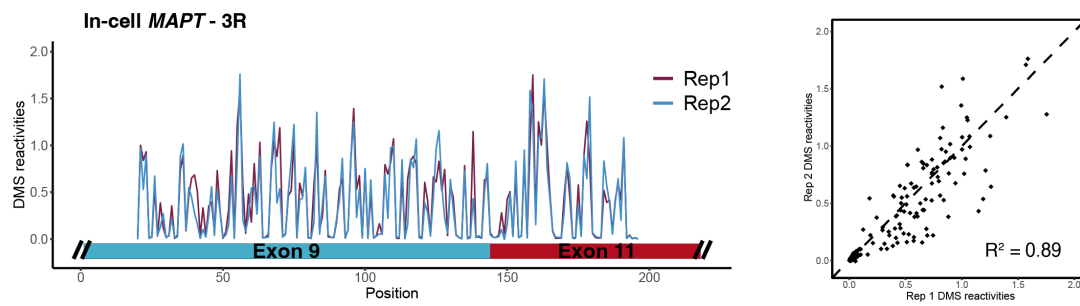**B**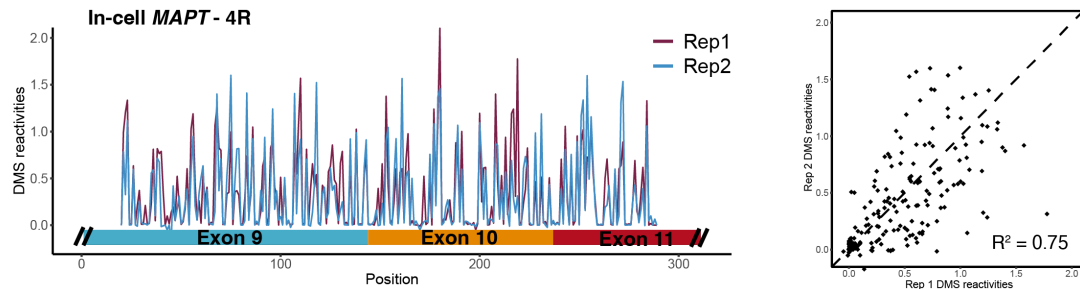**C**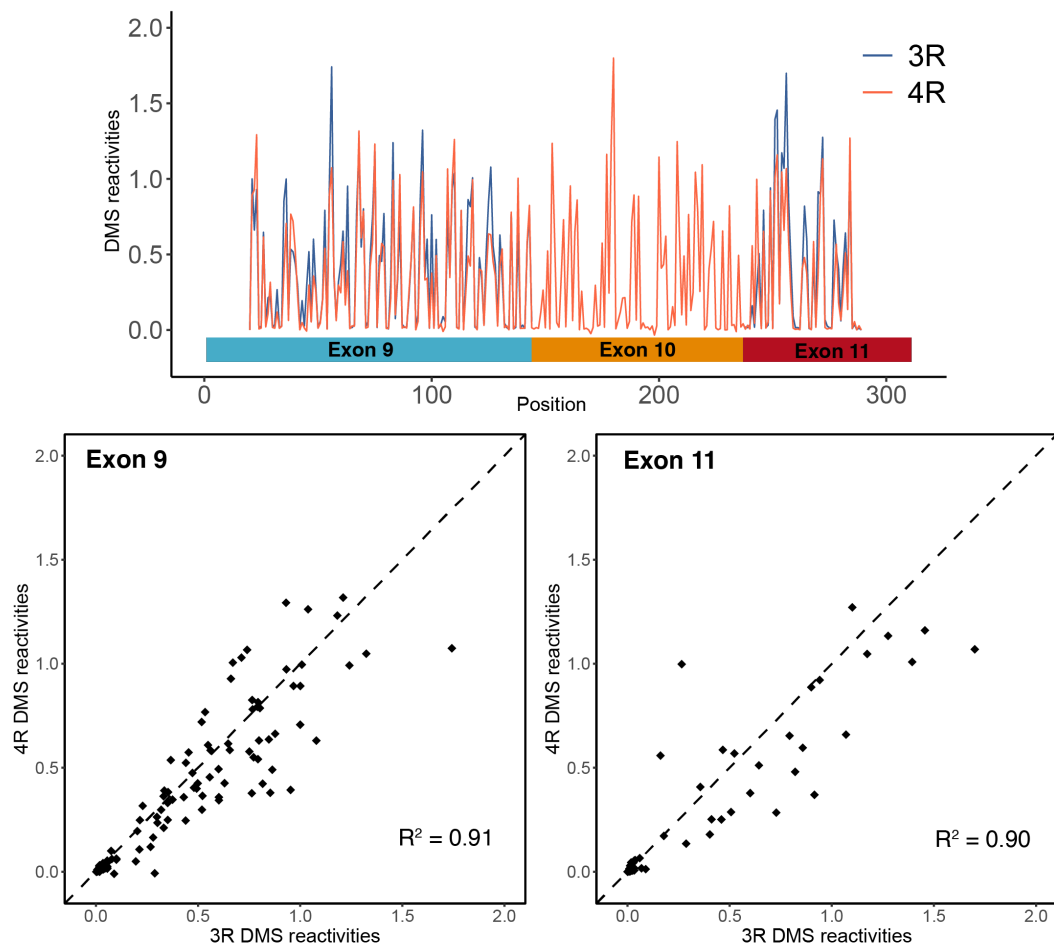

Supplement: supp [file elife_poa_e73888_Figure_1_figure_supplement_4.pdf › elife_poa_e73888_Figure_1_figure_supplement_4.pdf]

**A**

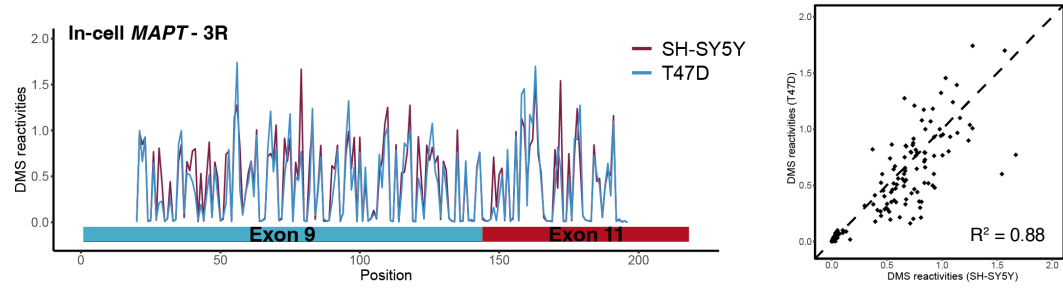

**B**

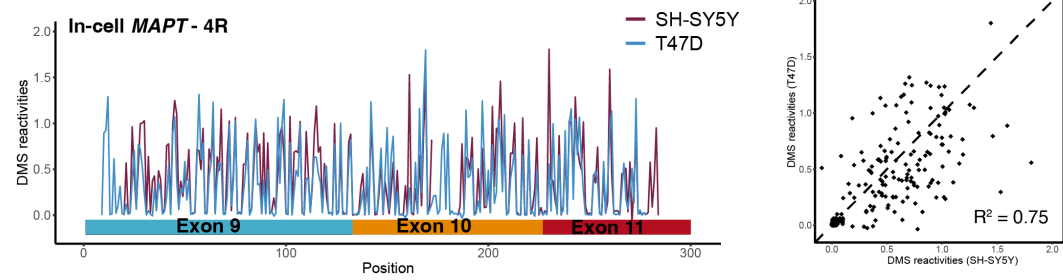

Supplement: supp [file elife_poa_e73888_Figure_1_figure_supplement_5.pdf › elife_poa_e73888_Figure_1_figure_supplement_5.pdf]

**A**

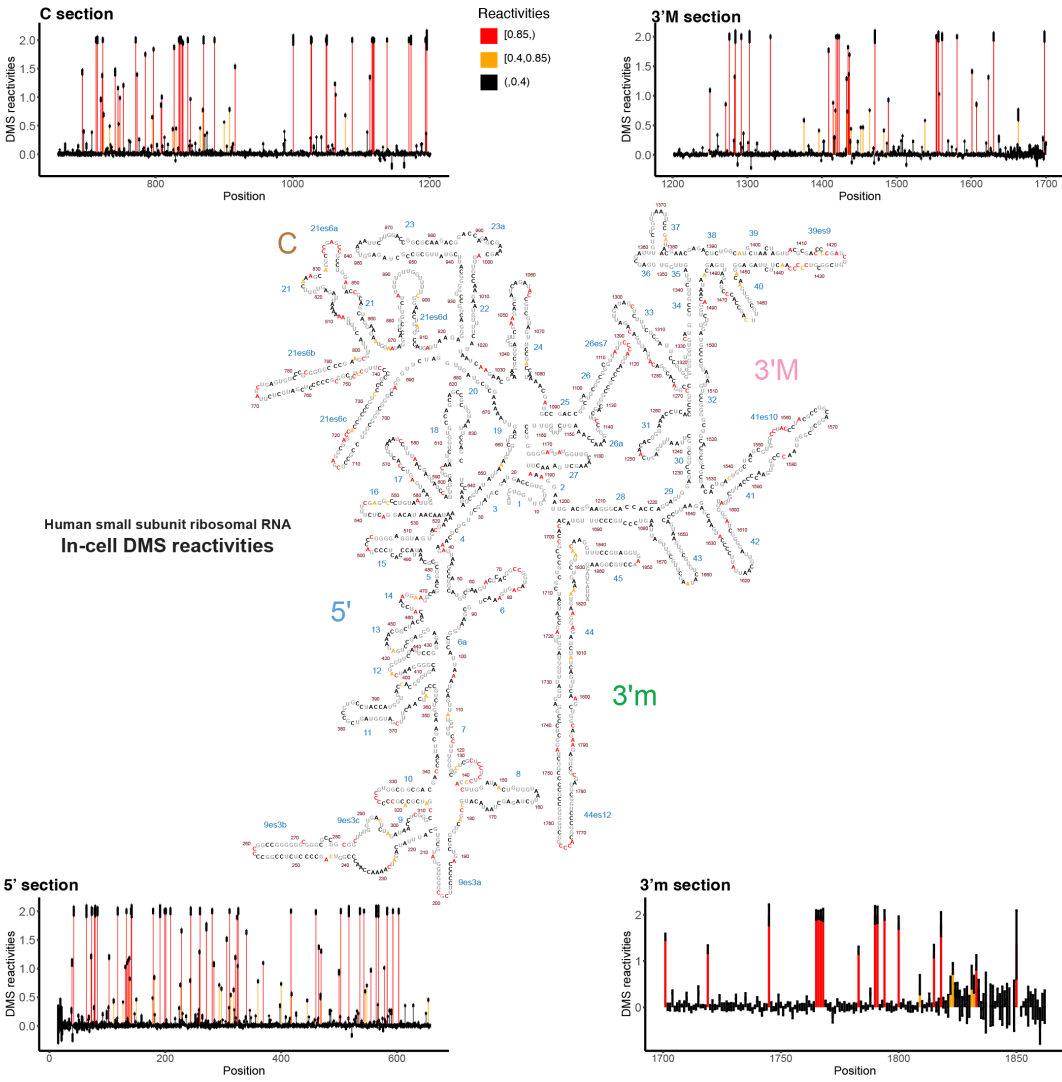

Supplement: supp [file elife_poa_e73888_Figure_1_figure_supplement_6.pdf › elife_poa_e73888_Figure_1_figure_supplement_6.pdf]

**A**

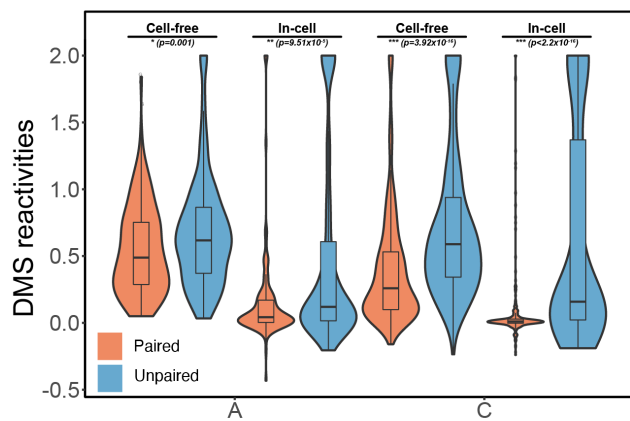

**B**

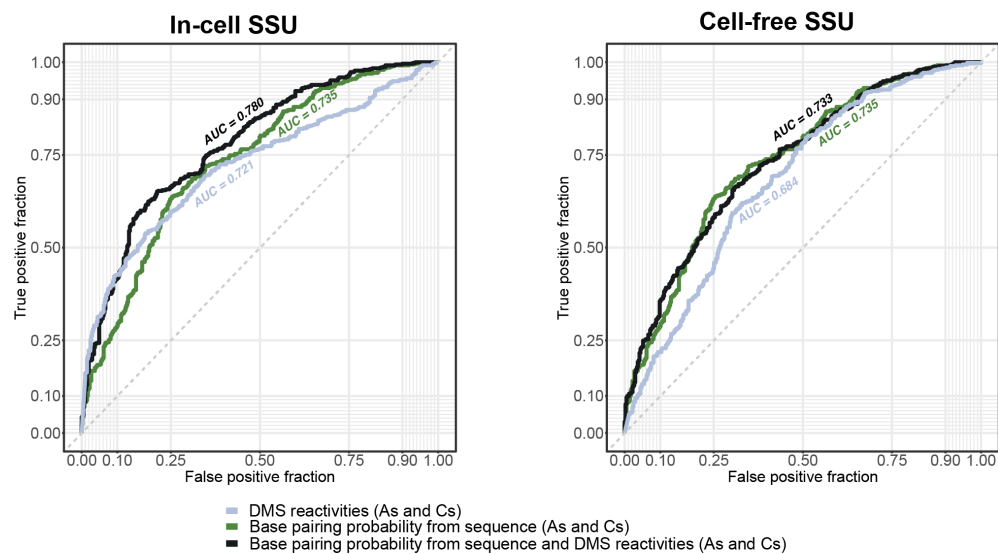

**C**

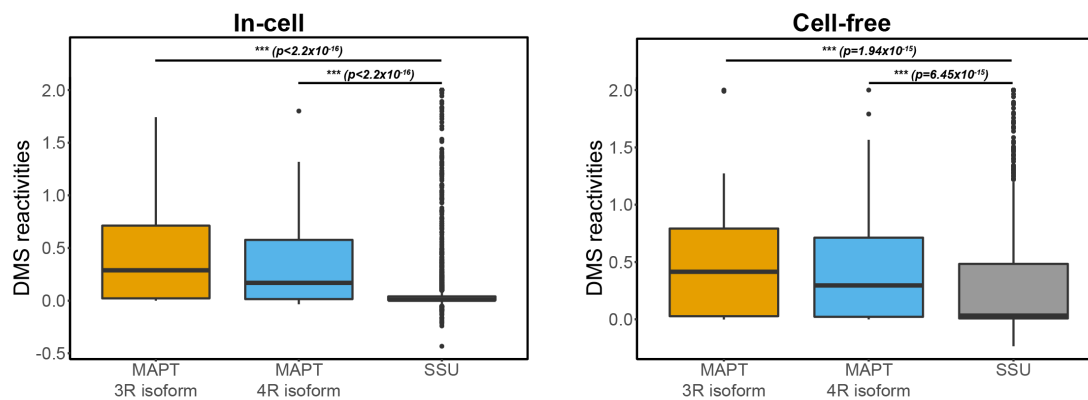

Supplement: supp [file elife_poa_e73888_Figure_1_figure_supplement_7.pdf › elife_poa_e73888_Figure_1_figure_supplement_7.pdf]

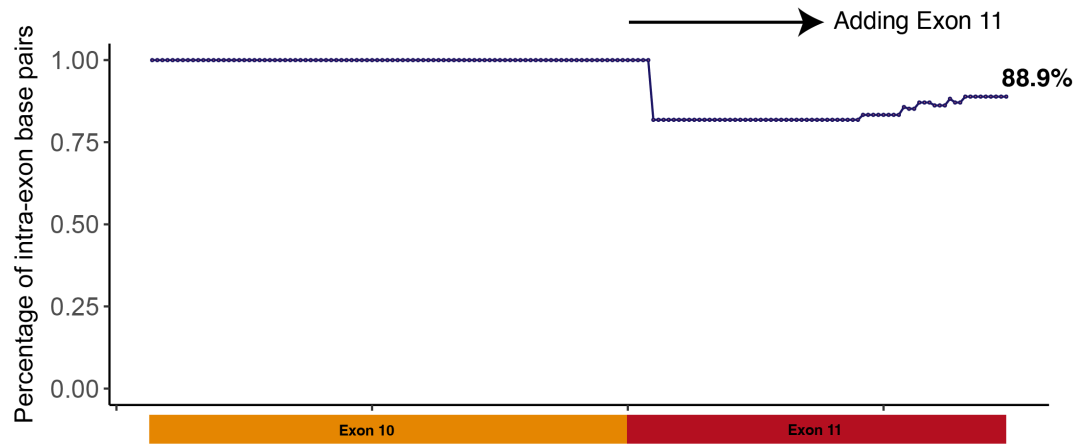

Supplement: supp [file elife_poa_e73888_Figure_1_figure_supplement_8.pdf › elife_poa_e73888_Figure_1_figure_supplement_8.pdf]

**A**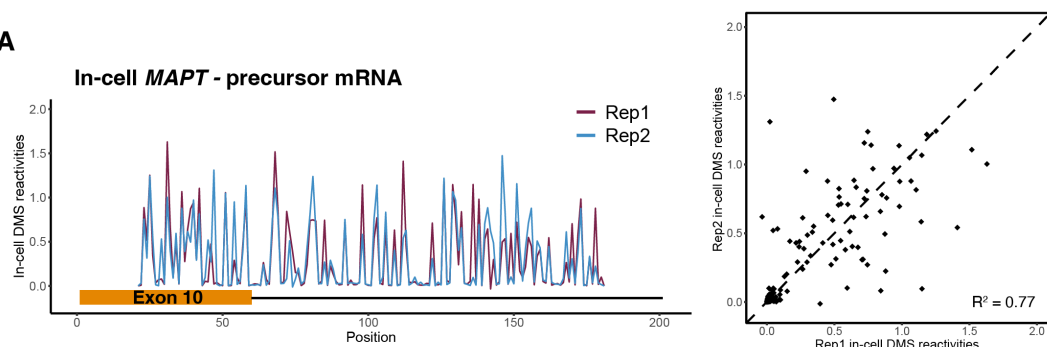**B**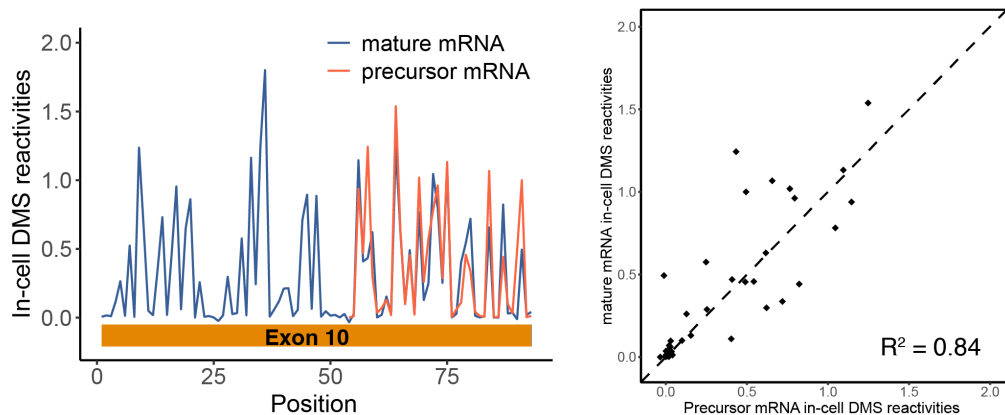**C**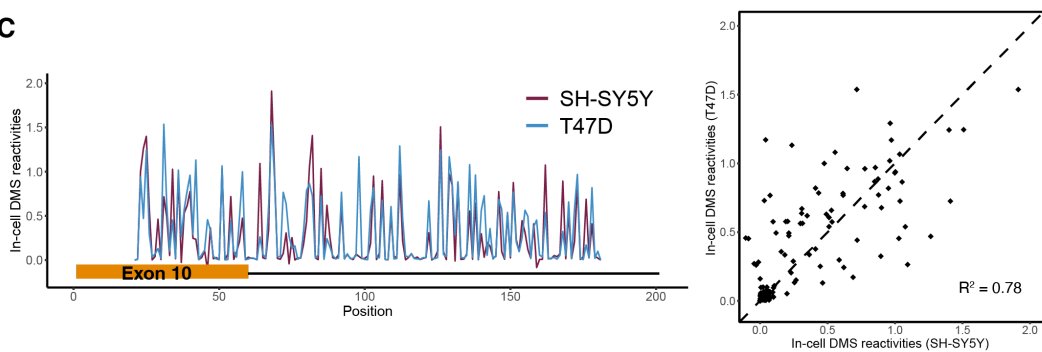**D**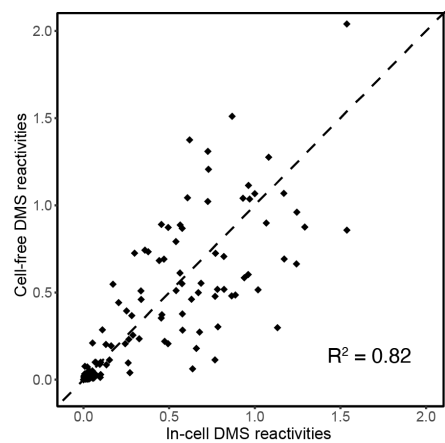

Supplement: supp [file elife_poa_e73888_Figure_2_figure_supplement_1.pdf › elife_poa_e73888_Figure_2_figure_supplement_1.pdf]

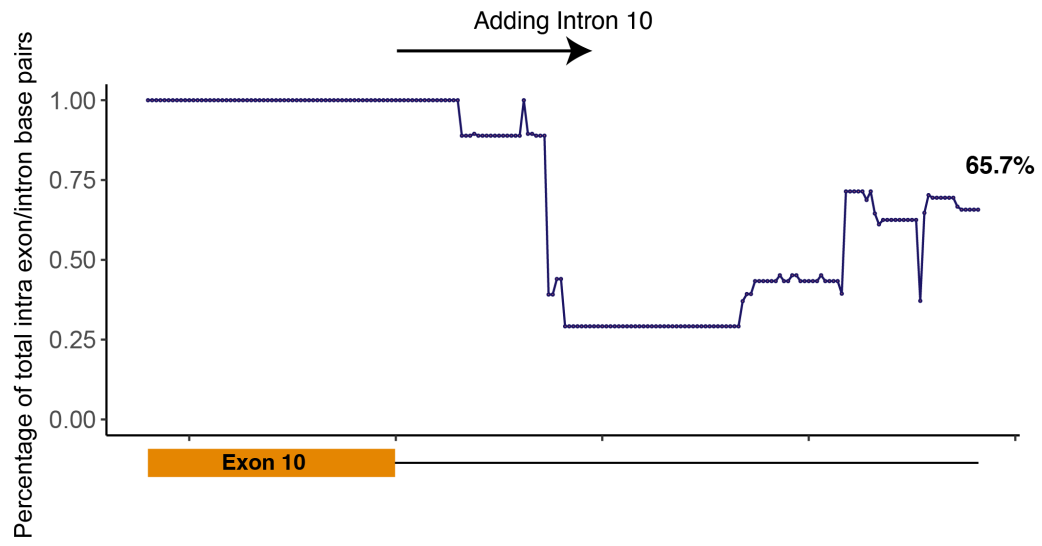

Supplement: supp [file elife_poa_e73888_Figure_2_figure_supplement_2.pdf › elife_poa_e73888_Figure_2_figure_supplement_2.pdf]

**In-cell**

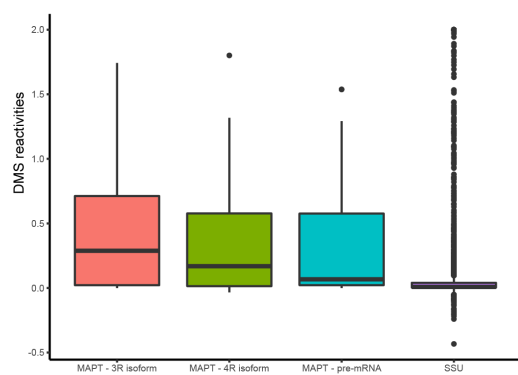

**Cell-free**

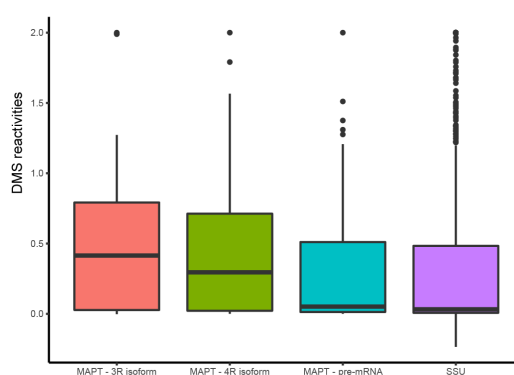

Supplement: supp [file elife_poa_e73888_Figure_2_figure_supplement_3.pdf › elife_poa_e73888_Figure_2_figure_supplement_3.pdf]

**A**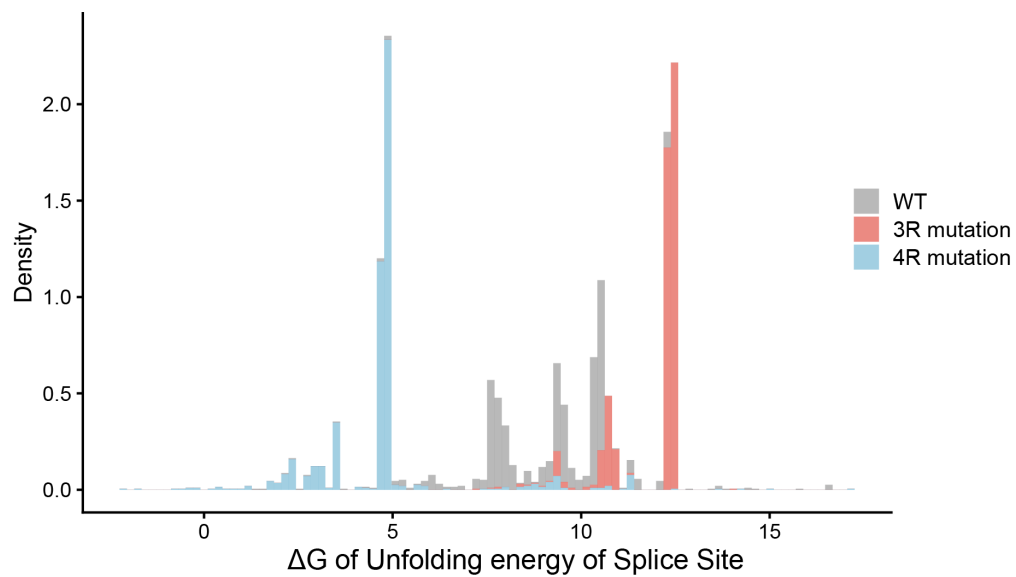**B**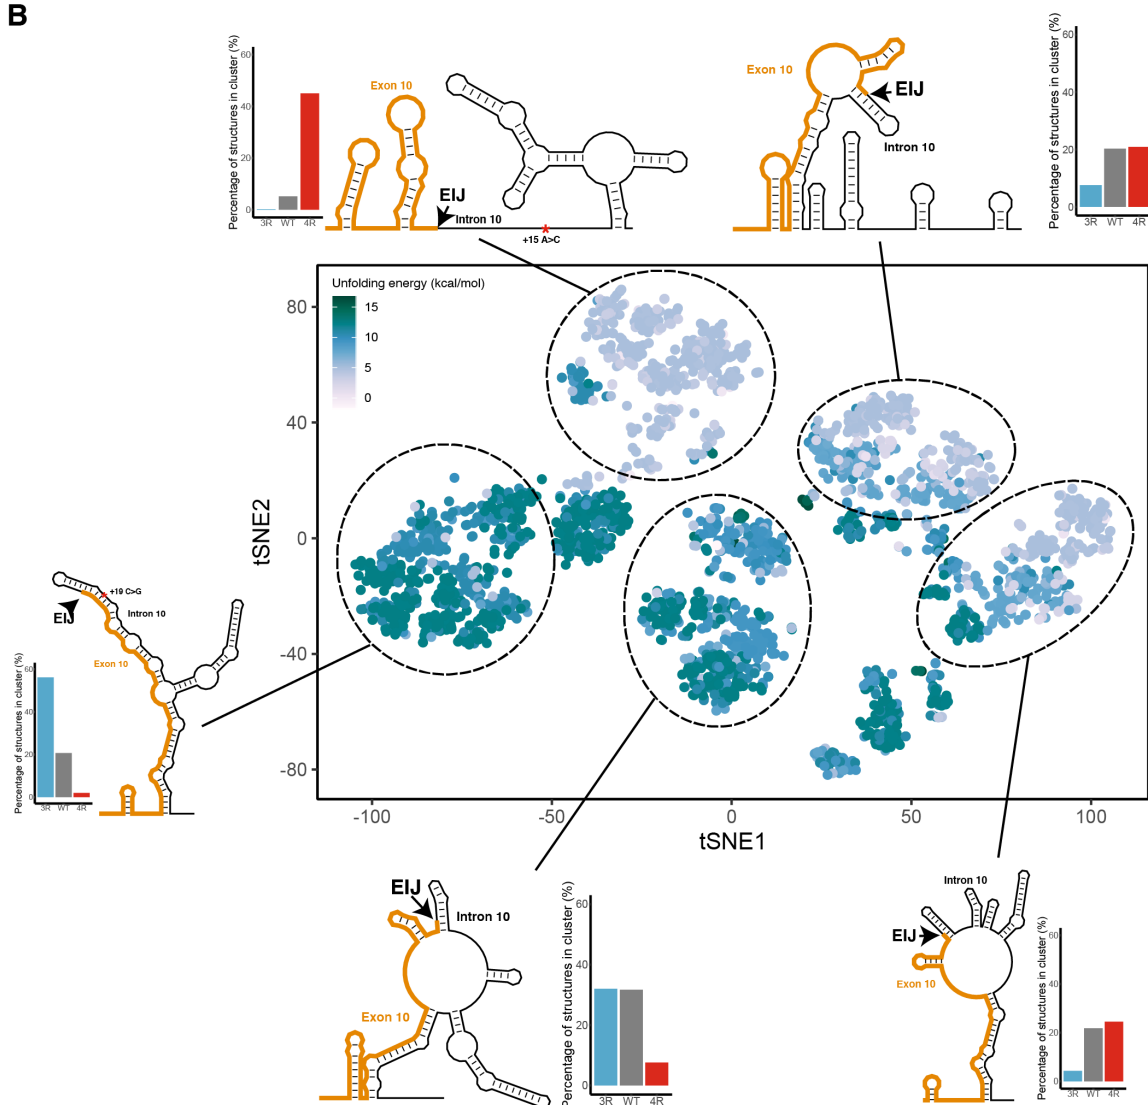

Supplement: supp [file elife_poa_e73888_Figure_2_figure_supplement_4.pdf › elife_poa_e73888_Figure_2_figure_supplement_4.pdf]

**A**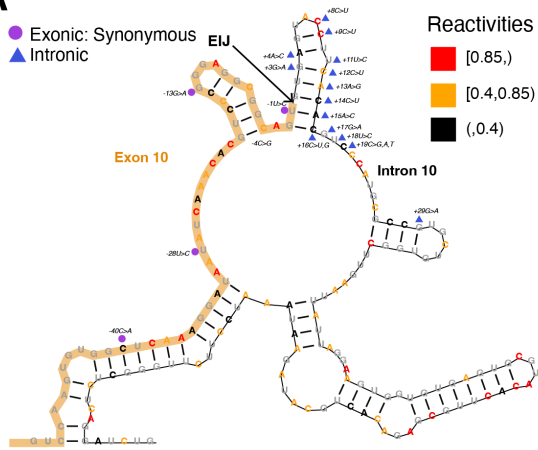**B**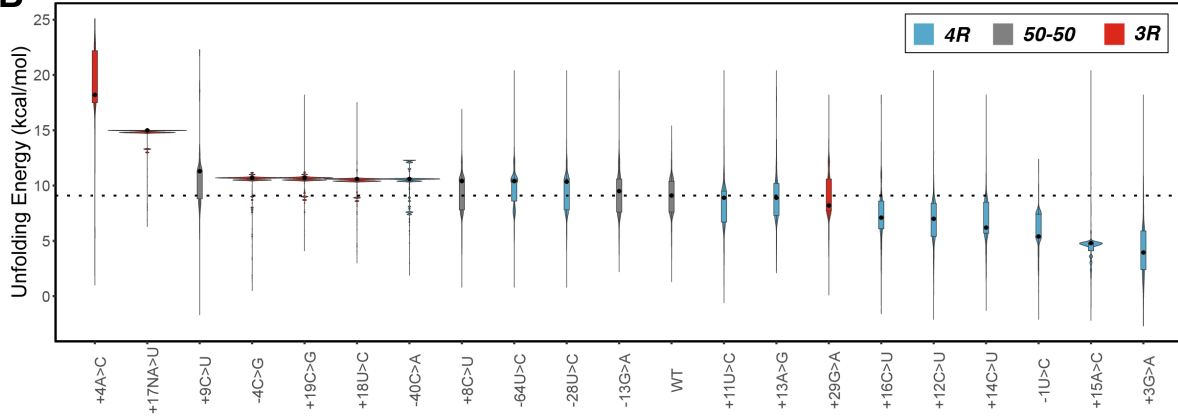**C**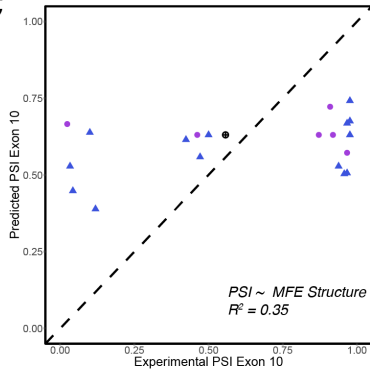**D**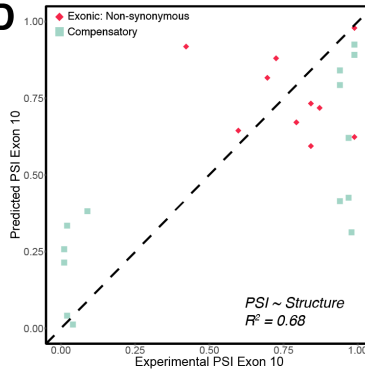**E**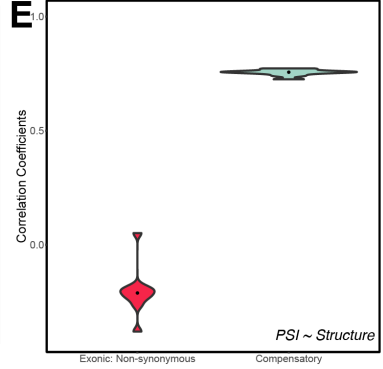

Supplement: supp [file elife_poa_e73888_Figure_3_figure_supplement_1.pdf › elife_poa_e73888_Figure_3_figure_supplement_1.pdf]

**A**

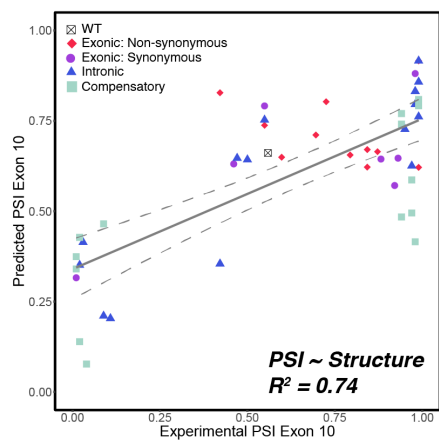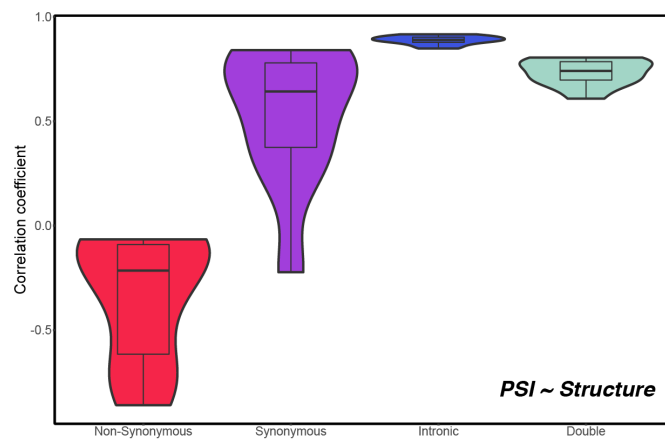

**B**

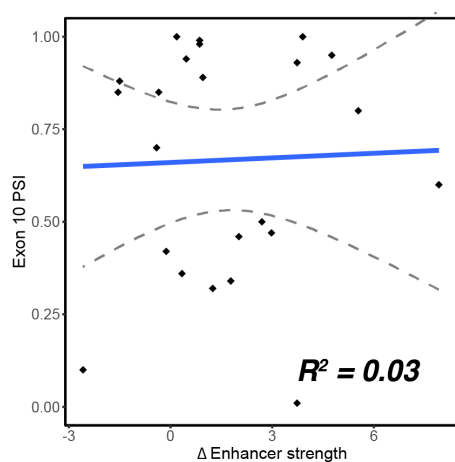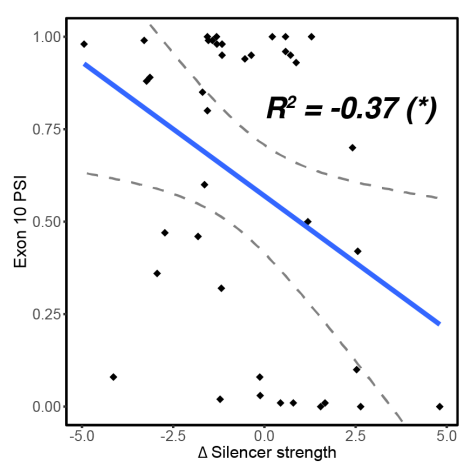

Supplement: supp [file elife_poa_e73888_Figure_4_figure_supplement_1.pdf › elife_poa_e73888_Figure_4_figure_supplement_1.pdf]

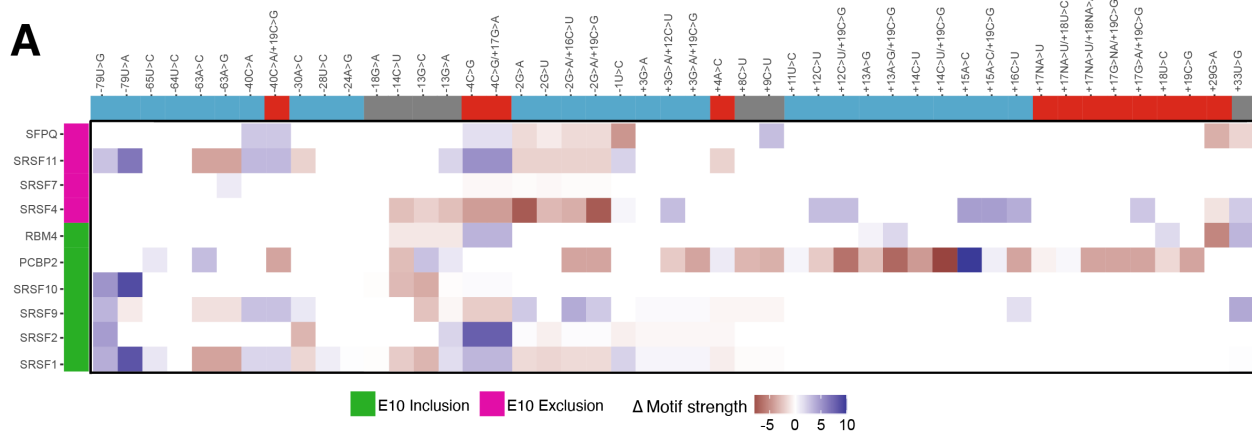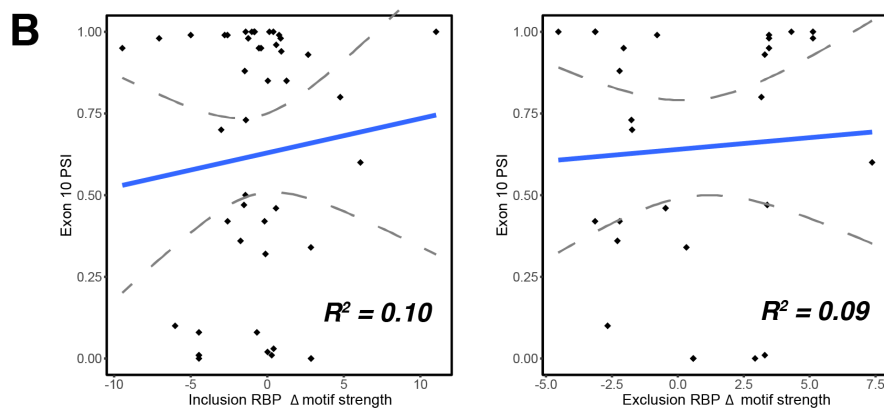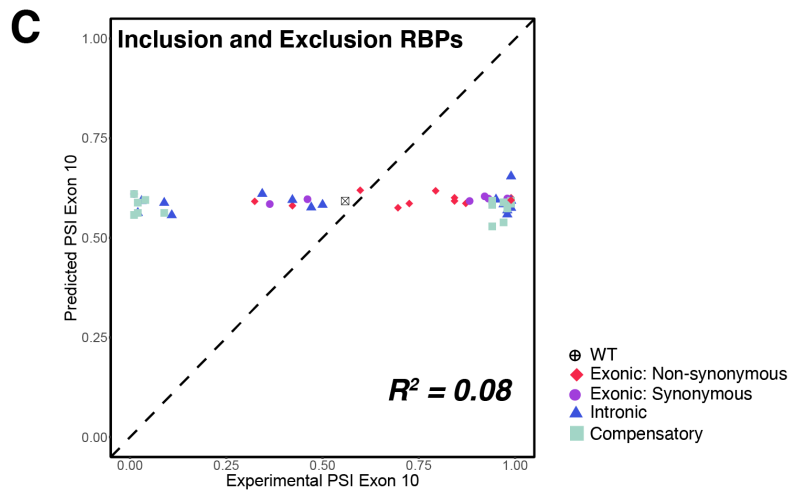

Supplement: supp [file elife_poa_e73888_Figure_4_figure_supplement_2.pdf › elife_poa_e73888_Figure_4_figure_supplement_2.pdf]

**A**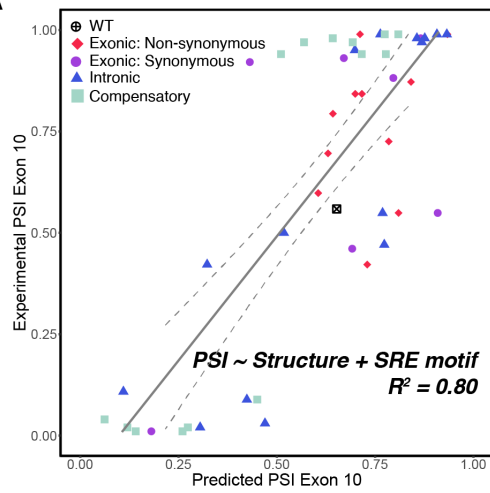**B**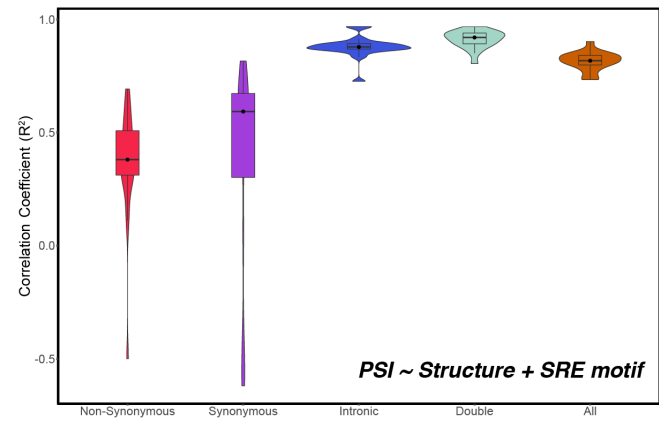**C**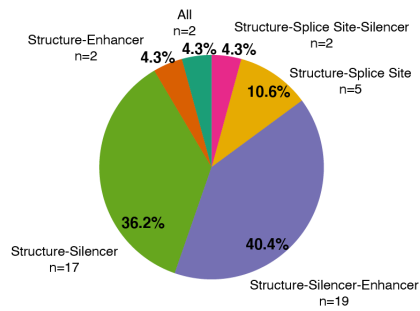

Supplement: supp [file elife_poa_e73888_Figure_5_figure_supplement_1.pdf › elife_poa_e73888_Figure_5_figure_supplement_1.pdf]

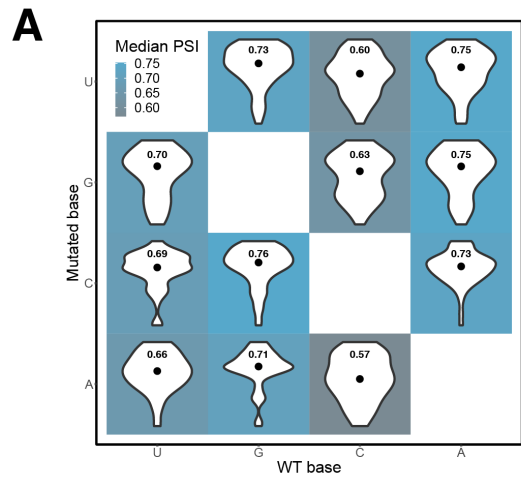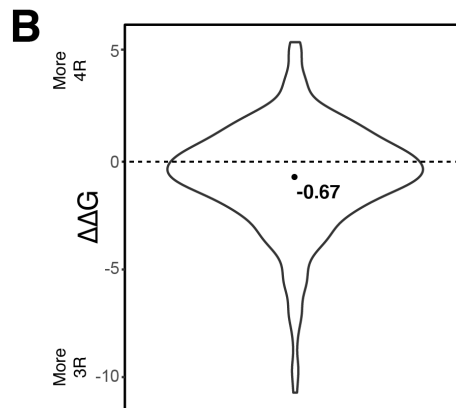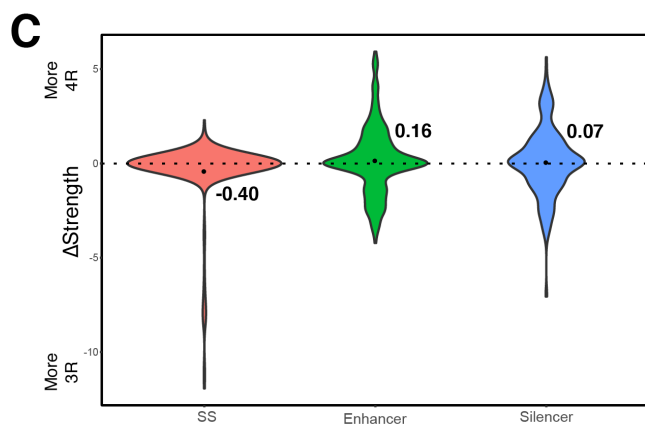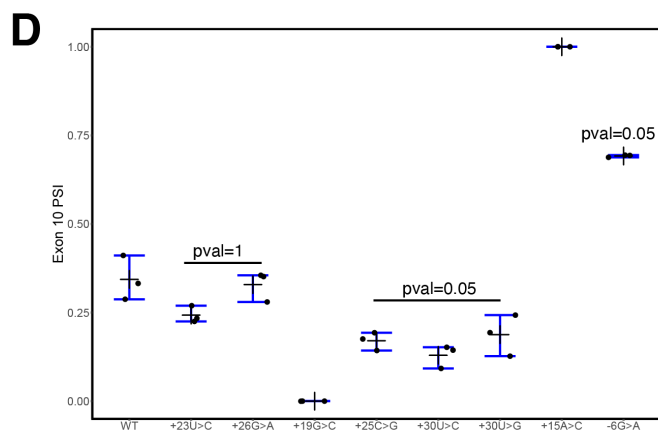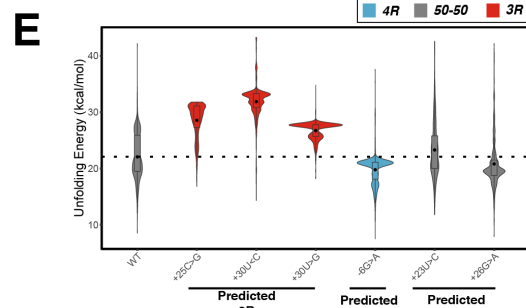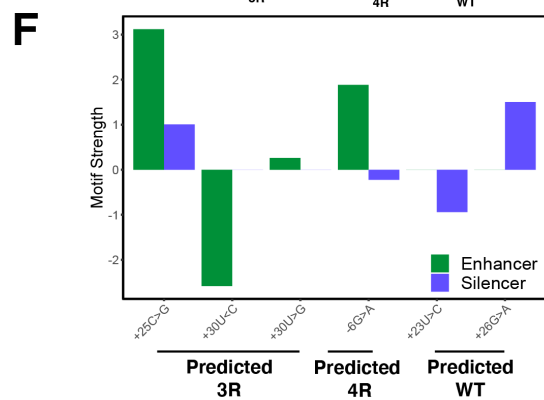

Supplement: supp [file elife_poa_e73888_Figure_6_figure_supplement_1.pdf › elife_poa_e73888_Figure_6_figure_supplement_1.pdf]
